# Supplementary material for: Spermatogonial Stem Cell Numbers Are Reduced by Transient Inhibition of GDNF Signaling but Restored by Self-Renewing Replication when Signaling Resumes
Source: PubMed Central journal article supplement — Stem Cell Reports. 2021 Feb 25;16(3):597–609. doi: 10.1016/j.stemcr.2021.01.015 (PMC7940257; doi:10.1016/j.stemcr.2021.01.015), 2021-02-25
Supplement: mmc2.pdf [file mmc2.pdf]

# Spermatogonial Stem Cell Numbers Are Reduced by Transient Inhibition of GDNF Signaling but Restored by Self-Renewing Replication when Signaling Resumes

Nicole Parker,<sup>1</sup> Andrew Laychur,<sup>1</sup> Meena Sukwani,<sup>2</sup> Kyle E. Orwig,<sup>2</sup> Jon M. Oatley,<sup>3</sup> Chao Zhang,<sup>4</sup> Florentine U. Rutaganira,<sup>4</sup> Kevan Shokat,<sup>4</sup> and William W. Wright<sup>1,\*</sup>

<sup>1</sup>Department of Biochemistry and Molecular Biology, Johns Hopkins Bloomberg School of Public Health, 615 N. Wolfe Street, Baltimore, MD 21205, USA

<sup>2</sup>Department of Obstetrics, Gynecology and Reproductive Sciences, Magee-Womens Research Institute, University of Pittsburgh School of Medicine, 204 Craft Avenue, Pittsburgh, PA 15213, USA

<sup>3</sup>School of Molecular Biosciences, Center for Reproductive Biology, College of Veterinary Medicine, Washington State University, Pullman WA 99164, USA

<sup>4</sup>Department of Cellular and Molecular Pharmacology and Howard Hughes Medical Institute, University of California San Francisco, 600 16<sup>th</sup> Street, MC 2280, San Francisco, CA 94158, USA

\*Correspondence: [wwright1@jhu.edu](mailto:wwright1@jhu.edu)

<https://doi.org/10.1016/j.stemcr.2021.01.015>

## SUMMARY

One cause of human male infertility is a scarcity of spermatogonial stem cells (SSCs) in testes with Sertoli cells that neither produce adequate amounts of GDNF nor form the Sertoli-Sertoli junctions that form the blood-testis barrier (BTB). These patients raise the issue of whether a pool of SSCs, depleted due to inadequate GDNF stimulation, will expand if normal signaling is restored. Here, we reduce adult mouse SSC numbers by 90% using a chemical-genetic approach that reversibly inhibits GDNF signaling. Signal resumption causes all remaining SSCs to replicate immediately, but they primarily form differentiating progenitor spermatogonia. Subsequently, self-renewing replication restores SSC numbers. Testicular GDNF levels are not increased during restoration. However, SSC replication decreases as numbers of SSCs and progenitors increase, suggesting important regulatory interactions among these cells. Finally, sequential loss of SSCs and then pachytene spermatocytes causes dissolution of the BTB, thereby recapitulating another important characteristic of some infertile men.

## INTRODUCTION

Many studies have demonstrated that glial cell line-derived neurotrophic factor (GDNF), a product of Sertoli cells and in some species, peritubular myoid cells, is essential for establishing and maintaining the pool of spermatogonial stem cells (SSCs), the foundational spermatogenic cells. Neonatal mice that are heterozygous null for GDNF fail to produce normal numbers of SSCs, and those stem cells are eventually lost (Meng et al., 2000). Juvenile mice that undergo Cre-mediated excision of the gene encoding the ligand binding subunit of the GDNF receptor, *GFR $\alpha$ 1*, lose SSCs within 3 weeks (Sada et al., 2012). We have shown that GDNF is essential for maintaining SSCs in the adult mouse testis by use of a chemical-genetic approach that rapidly but reversibly inhibits GDNF signaling (Savitt et al., 2012). This approach combined mice with a V805A mutation in Ret, the kinase subunit of the GDNF receptor, and daily injections of 1NA-PP1, a bulky ATP competitive inhibitor that only binds the mutant kinase. We demonstrated that inhibition of GDNF signaling for 9 days caused loss of some SSCs, while inhibition for 11 to 30 days resulted in quantitative stem cell loss (Parker et al., 2014; Savitt et al., 2012). Decreased replication and the irreversible differentiation of SSCs into progenitor spermatogonia and then fully mature type A1 spermatogonia deplete the stem cell pool (Parker et al., 2014).

Over time, a seminiferous epithelium without stem cells loses increasingly mature spermatogenic cells, a process called maturation depletion. Eventually, only Sertoli cells remain, a condition called Sertoli cell-only (SCO) syndrome. Importantly, this syndrome is one cause of infertility of men. While all tubules are SCO in some of these men, tubules of others contain small segments with a full complement of spermatogenic cells and, thus, SSCs (Schlegel, 2004). The similarity in testicular histology of mouse testes deprived of GDNF signaling to men with SCO syndrome led us to hypothesize that Sertoli cells in these human testes produce abnormally low levels of GDNF. Our recent studies support this hypothesis (Singh et al., 2017). In addition, our detailed transcriptional analysis of highly regressed SCO human tubules detected all SSC markers, although at markedly reduced levels (Paduch et al., 2019). Thus, these tubules appear to contain a few unproductive stem cells.

An important question arose from our clinical and basic studies; if inadequate stimulation by GDNF causes loss of most but not all SSCs, could the stem cell pool be rebuilt if GDNF stimulation was restored to normal? Experiments described herein answer this question by evaluating the restoration of SSCs and their progenitor spermatogonia in Ret(V805A) mice that were treated for 9 days with 1NA-PP1. An affirmative answer might seem obvious, but it is not a forgone conclusion. SSCs are phenotypically

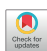

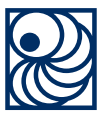

heterogeneous both in their replicative activity and in their expression of receptors for critical paracrine factors, such as GDNF (Kubota, 2019). It is entirely possible that inhibition of GDNF signaling selects a subset of SSCs that are more resistant to differentiation but have a reduced capacity to rebuild the stem cell pool when GDNF signaling is restored. Alternatively, inhibition might result in epigenetic changes that alter a stem cell's self-renewing capacity (Farlik et al., 2015).

We also sought to determine if following 9 days of inhibited GDNF signaling, self-renewing stem cell replication was primarily responsible for restoring SSC numbers and consequently the entire spermatogenic lineage. We posited that processes that regulate numbers of SSCs in normal mature testis also regulate restoration. A long-standing model proposes that SSCs are a subset of solitary, highly undifferentiated spermatogonia, which upon replication generates either a new stem cell or differentiating progenitor spermatogonia. It is further proposed that niche factors, such as GDNF and FGF2, regulate which cell types are generated (de Rooij, 2001, 2017). However, two recent studies, which used busulfan to kill some SSCs, suggest that this classical model does not explain SSC restoration. One study concluded that an efficient restorative process requires fragmentation of chains of progenitor spermatogonia, and their subsequent dedifferentiation into SSCs (Carrieri et al., 2017). The second concluded that progenitors in short chains and SSCs functionally interconvert and that busulfan-induced damage to the testis increases GDNF concentration, which rebalances this interconversion toward stemness (La et al., 2018).

In our previous studies we treated mice for 9 days with 1NA-PP1; 19 days later about half of the seminiferous tubules were SCO (Parker et al., 2014). An important issue that arose was whether this result reflected a 50% loss of functional SSCs or whether a much larger percentage of SSCs were lost, but their numbers were partially restored after GDNF signaling resumed. We resolve this issue by evaluating the numbers of transplantable SSCs that remain in a testis immediately following 9 days of inhibition of GDNF signaling.

We also investigated the extent to which replication drives SSC restoration, as well as that of progenitor spermatogonia. Those studies required that we examine intact seminiferous tubules, enumerate both SSCs and progenitor spermatogonia, and also determine the percentage of cells that were replicating. In those studies, we defined SSCs as expressing a stem cell marker and existing as solitary, single ( $A_s$ ) cells. We acknowledge that the pool of  $A_s$  spermatogonia contains both SSCs and the most undifferentiated of their immediate progeny, progenitor spermatogonia. However, these progenitors may de-differentiate into functional SSCs (Carrieri et al., 2017; Nakagawa et al., 2010). We

defined progenitors as two or more spermatogonia that express the same stem cell marker and have plasma membranes in direct physical contact. Cells in pairs ( $A_{pr}$ ) cells are considered less differentiated than cells in chains of  $A$  aligned ( $A_{al}$ ) spermatogonia (de Rooij, 2001).

Our studies were founded on the proposition that investigation of the loss and restoration of SSCs in 1NA-PP1-treated Ret(V805A) mice might shed light on the ontogeny of human SCO syndrome and eventually suggest therapies for men diagnosed with this syndrome who nonetheless retain some SSCs. For this proposition to be valid, the restoration of SSCs that follows a temporary inhibition of GDNF signaling must occur in a tissue that develops the same architectural deficit observed in human SCO tubules: the failure of adjacent Sertoli cells to form the blood-testis barrier, a series of adhesive junctions essential for fertility (Mruk and Cheng, 2015). We note that the presence of pachytene spermatocytes was recently reported to be required for barrier formation (Li et al., 2018). It follows that, if our mouse model recapitulates human SCO syndrome, loss of SSCs and then eventually of pachytene spermatocytes should cause dissolution of this barrier. Our last experiment tests this proposition.

The above considerations led us to test the following hypothesis: inhibition of GDNF signaling causes a substantial loss of SSCs and, with the resumption of signaling, self-renewing replication restores stem cell numbers. We predict that the loss of differentiated spermatogenic cells following loss of SSCs results in dissolution of the blood-testis barrier, as occurs in human SCO testes.

## RESULTS

### Nine Days of Inhibited GDNF Signaling Results in a Substantial Loss of SSCs, but Their Numbers are Significantly Restored Once Signaling Resumes

This study had three parts, which were conducted simultaneously: (1) we assayed the effect of 9 days of inhibited GDNF signaling on numbers of transplantable SSCs, (2) we confirmed that the effect of inhibiting GDNF signaling recapitulated previous results, and (3) we evaluated both the loss and restoration of SSCs by enumerating spermatogonia that expressed a highly restricted SSC marker, *Id4-eGFP* (Helsel et al., 2017; Parker et al., 2014; Savitt et al., 2012). Ret(V805A) mice were transgenic for both LacZ and *Id4-eGFP*. (In subsequent studies mice were not transgenic.)

Part 1: single germ cell suspensions were prepared 2 to 3 days after the last injection with 1NA-PP1 or vehicle and ~800,000 cells from treated and control testes were transplanted into 17 and 16 germ cell-deficient testes, respectively. Two months later we enumerated colonies

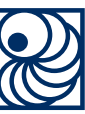

of LacZ<sup>+</sup> spermatogenic cells that encircled a seminiferous tubule. Transplants from control mice generated 10 times more LacZ<sup>+</sup> colonies than germ cells from treated animals (Figure 1A). Thus, inhibition of GDNF signaling for 9 days causes 90% loss of transplantable SSCs.

Part 2: we sacrificed three control and three treated animals 2 months after the last injection of vehicle or 1NA-PP1-HCl, prepared their testes for histological analysis, and determined the percentage of tubules that exhibited normal spermatogenesis, incomplete spermatogenesis (missing one to three generations of germ cells), or SCO syndrome (Parker et al., 2014; Savitt et al., 2012). Consistent with previous studies, normal or incomplete spermatogenesis was observed in 49% and 22% of tubules, respectively, of treated animals (Figure 1B). The rest were SCO (Parker et al., 2014; Savitt et al., 2012).

Part 3: we collected seminiferous tubules from five control mice, and from mice sacrificed 2–4 days or 2 months after treatment (n = 3/group). To distinguish A<sub>s</sub> from A<sub>pr</sub> and A<sub>al</sub> spermatogonia, tubules were processed for GFR $\alpha$ 1 immunocytochemistry. Microscopic analysis revealed that all *Id4-eGFP*<sup>+</sup> spermatogonia co-expressed GFR $\alpha$ 1 and all existed as A<sub>s</sub> spermatogonia in controls, in tubules collected 2–4 days after treatment and in about 75% of the surface of tubules collected 2 months later (Figures 1C and 1D). In the remaining areas, *Id4-eGFP*<sup>+</sup> cells were in clusters (Figure 1E).

Morphometric analysis revealed that 2–4 days after treatment, the density of *Id4-eGFP*<sup>+</sup> spermatogonia was reduced to 16% of control, while at 2 months cell densities were increased to 92% (Figure 1F). However, the clustering of some cells suggests that restoration was incomplete.

### Self-Renewing Replication Restores Numbers of SSCs after GDNF Signaling Resumes

As discussed in the Introduction, three different mechanisms potentially explain the restoration of the stem cell pool that follows resumption of GDNF signaling. Our primary goal for the next four studies was to determine if self-renewing replication restored SSCs. A secondary goal was to determine if replication of both SSCs and progenitor spermatogonia restored progenitors. To meet these goals, we compared a direct measurement of increased cell numbers with an estimate of new cells formed by replication. The need for quantitation precluded lineage tracing, which generates only qualitative data unless a high percentage of SSCs are marked at a defined time (Lord and Oatley, 2018). Results of one study suggest that 2 weeks of induction may be necessary to mark most SSCs (Sharma et al., 2019), thereby excluding analysis of restoration initiation.

Study 1 tested an implicit assumption in our definition of progenitor spermatogonia: GFR $\alpha$ 1<sup>+</sup> spermatogonia whose

plasma membranes make direct physical contact function in a coordinated manner. Study 2 defined changes in numbers and replication of SSCs and progenitor spermatogonia during and after 9 days of inhibited GDNF signaling. We identified replicating cells by their incorporation of the thymidine analog 5-ethynyl-2'-deoxyuridine (EdU), which was injected 24 h before tissue collection. Study 3 defined the fraction of cells in S phase during a 24-h period that were labeled with EdU. Determining labeling efficiency is necessary for EdU's half-life in serum is about 30 min and cells entering S phase hours after EdU injection might not be labeled (Cheraghali et al., 1995). Study 4 determined the average length of the cell cycle of SSCs. Finally, we used the results of the last three studies to estimate yield of new cells from replication after GDNF signaling resumption, and we compared this yield with the actual increase in cell number.

Study 1: we used cell replication to test if four GFR $\alpha$ 1<sup>+</sup> cells in a chain functioned coordinately. Mice were injected with EdU, tubules were collected 24 h later, and EdU<sup>+</sup> and GFR $\alpha$ 1<sup>+</sup> cells in these tubules identified. GFR $\alpha$ 1<sup>+</sup>, EdU<sup>+</sup>, and GFR $\alpha$ 1<sup>+</sup>, EdU<sup>-</sup> cells were observed in the same microscopic field (Figure S1A). (This we observed in all experiments.) However, for 72% of all chains of four A<sub>al</sub> cells, when at least one cell was EdU<sup>+</sup>, so, too, were the other three (Figure S1B). Thus, spermatogonia that contact one another coordinate their replication.

Study 2: Ret(V805A) mice were treated for 9 days with 1NA-PP1 or vehicle, and tissues collected 1 day later (day 10 of the experiment) or on days 14, 18, 22, and 28. Here, we used GFR $\alpha$ 1 as the stem cell marker. Figure 2A presents confocal images of GFR $\alpha$ 1<sup>+</sup> A<sub>s</sub>, A<sub>pr</sub>, and A<sub>al</sub> spermatogonia on seminiferous tubules of control and treated mice. Few GFR $\alpha$ 1<sup>+</sup> cells were observed on day 10, but their numbers increased after GDNF signaling resumed. Unexpectedly on days 18 and 22, many of the chains of GFR $\alpha$ 1<sup>+</sup> A<sub>al</sub> spermatogonia were substantially longer than in control animals, and average chain length was significantly increased (Figure S1C). Qualitatively, similar trends were observed when we used a different marker, ZBTB16 (Figure S2) (Buaas et al., 2004).

To define the time course of recovery, we enumerated GFR $\alpha$ 1<sup>+</sup> A<sub>s</sub>, A<sub>pr</sub>, and A<sub>al</sub> spermatogonia (Figure 2B). (From here on, we refer to these cells in the text, but not in figure legends, as A<sub>s</sub>, A<sub>pr</sub>, and A<sub>al</sub> cells.) On day 10, the densities of A<sub>s</sub> and A<sub>pr</sub> cells were reduced to 8% and 10% of controls, respectively. Numbers of A<sub>s</sub> and A<sub>pr</sub> cells remained low on day 14 and then increased to 53% of control by day 28. Numbers of A<sub>al</sub> cells also were reduced to 8% of controls on day 10, but increased by 4-fold by day 14, and further to 63% of control on day 28. This more rapid recovery suggested that restoration was initially biased toward progenitor spermatogonia.

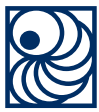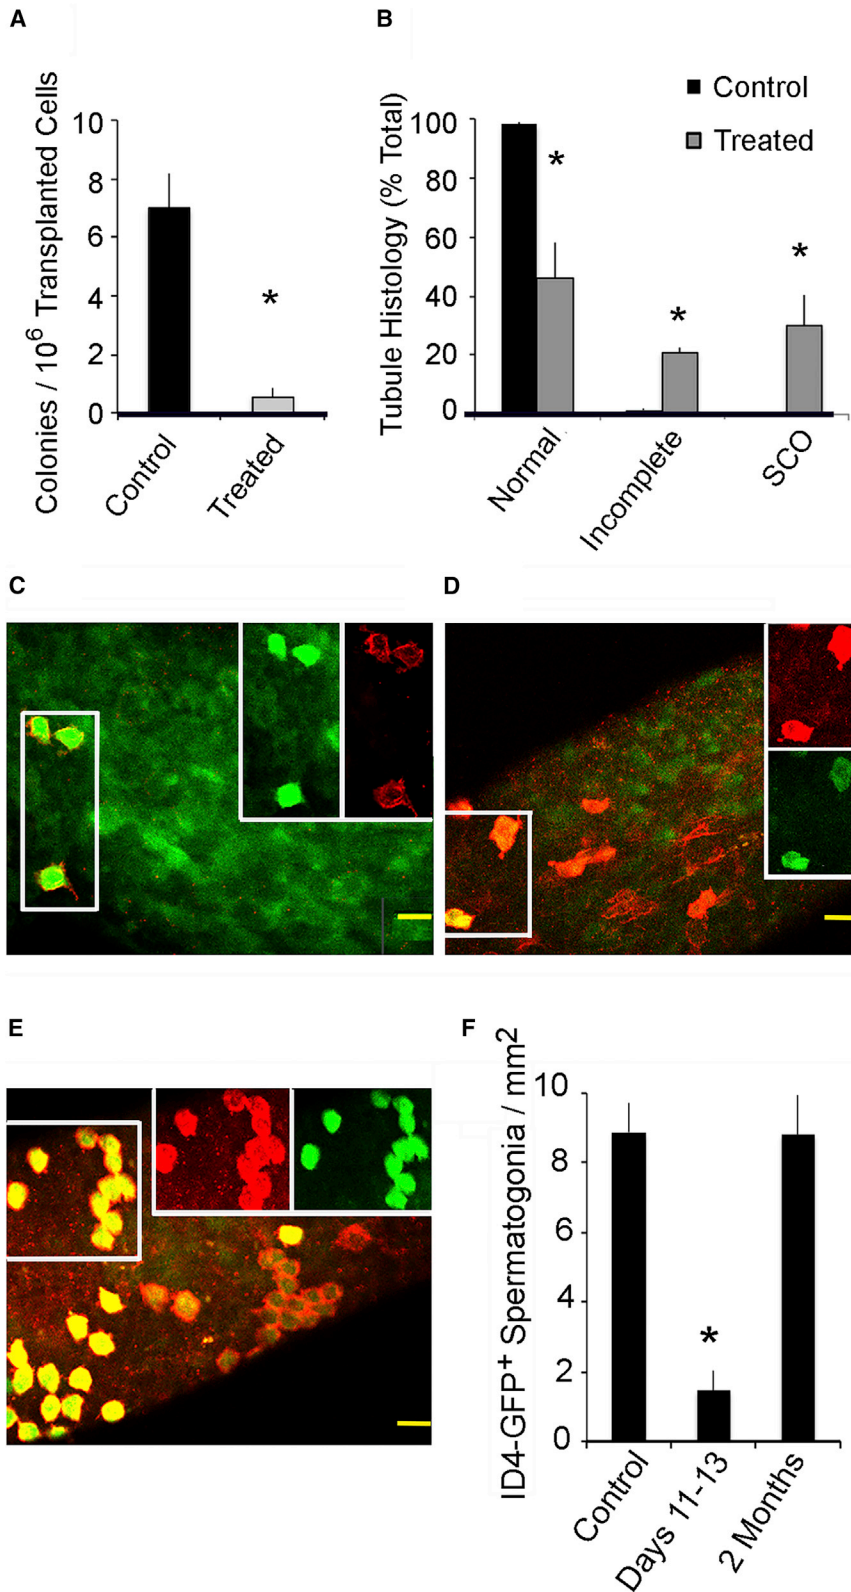

**Figure 1. Loss of SSCs during 9 Days of Inhibited GDNF Signaling and Their Partial Restoration 2 Months after Signaling Resumes**

Adult, *Ret V805A<sup>+/+</sup>*, *Rosa 26<sup>+/+</sup>*, *ID4-eGFP<sup>+/-</sup>* mice were injected for 9 days with vehicle (control) or with 1NA-PP1 (treated). Quantitative data are presented as mean + SEM. An asterisk indicates that treated mice differ from controls ( $p < 0.05$ ).

(A) The effects of inhibition of GDNF signaling on numbers of transplantable SSCs. Two to 4 days after the last injection, germ cells from each animal were transplanted into testes of germ cell-deficient mice. Germ cells from treated and control mice were transplanted into 17 and 16 testes, respectively, and LacZ<sup>+</sup> germ cell colonies per testis enumerated 2 months later. Data are presented as number of colonies per 10<sup>6</sup> transplanted cells per testis.

(B) Fraction of tubule cross-sections in control and treated animals were classified as exhibiting normal spermatogenesis, incomplete spermatogenesis, or Sertoli cell-only (SCO) syndrome. Testes were collected 2 months after the last injection, 1  $\mu$ m testis cross-sections were prepared and each tubule classified. Data ( $n = 3$ /group) are presented as fraction of tubule cross-sections per classification per testis.

(C–E). Confocal micrographs of GFR $\alpha$ 1<sup>+</sup> (red), ID4-eGFP<sup>+</sup> (green) spermatogonia in tubules of control and treated mice. The two boxes on the right side of an image separate red and green channels of the left hand box. Scale bars, 40  $\mu$ m. (C) Image from a control animal. (D) Image from an animal that was analyzed 2–4 days after the last injection 1NA-PP1. Similar images were obtained for 75% of the surface of tubules collected 2 months after treatment. (E) The remaining 25% contained clusters of GFR $\alpha$ 1<sup>+</sup>, ID4-eGFP<sup>+</sup> spermatogonia.

(F) Numbers of GFR $\alpha$ 1<sup>+</sup>, ID4-eGFP<sup>+</sup> spermatogonia/mm<sup>2</sup> of tubule surface for control ( $n = 5$ ) and treated mice analyzed 2–4 days or 2 months ( $n = 3$ /group) after the last injection.

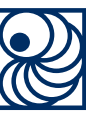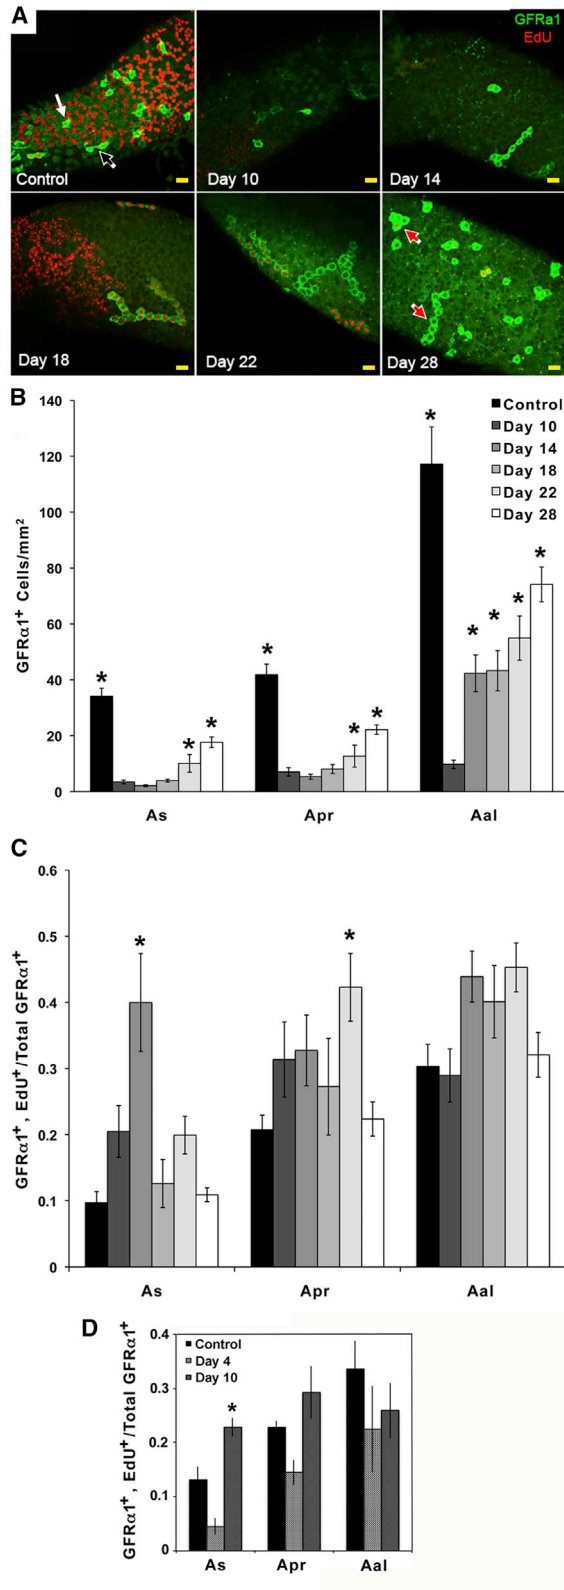

**Figure 2. The Effects of Loss and Resumption of GDNF Signaling on Densities of GFRα1<sup>+</sup> A<sub>s</sub>, A<sub>pr</sub>, and A<sub>al</sub> Spermatogonia and on the Fraction of Cells that Incorporated EdU**

(A) Representative 1.8 μm thick optical sections of GFRα1<sup>+</sup> A<sub>s</sub>, A<sub>pr</sub>, and A<sub>al</sub> spermatogonia (green) on intact seminiferous tubules. All mice were injected with EdU (red) 24 h before sample collection. Mice were injected with vehicle (Control) or with 1NA-PP1 for 9 days and samples collected on days 10, 14, 18, 22, and 28 of the experiment. White, black, and red arrows identify representative GFRα1<sup>+</sup> A<sub>s</sub>, A<sub>pr</sub>, and A<sub>al</sub> spermatogonia, respectively. Scale bars, 40 μm.

(B) Numbers of GFRα1<sup>+</sup> A<sub>s</sub>, A<sub>pr</sub>, and A<sub>al</sub> spermatogonia/mm<sup>2</sup> of seminiferous tubule surface in control mice and in mice treated with 1NA-PP1 for 9 days and analyzed on days 10, 14, 18, 22, and 28. Data are expressed as mean ± SEM (n = 8/group). An asterisk over a bar identifies that group as significantly different from treated animals on day 10. The inserted legend also applies to (C).

(C) Fractions of GFRα1<sup>+</sup> A<sub>s</sub>, A<sub>pr</sub>, and A<sub>al</sub> spermatogonia that incorporated EdU in controls and in mice that were treated with 1NA-PP1 for 9 days and analyzed on days 10–28. An asterisk over a bar indicates a significant difference from control.

(D). Fraction of total GFRα1<sup>+</sup> A<sub>s</sub>, A<sub>pr</sub>, and A<sub>al</sub> spermatogonia that incorporated EdU in controls and animals treated for 3 or 9 days with 1NA-PP1. EdU was injected 24 h before sample collection (days 4 or 10). Data are expressed as mean ± SEM (n = 5/group). An asterisk denotes a significant difference between days 4 and 10.

To define how cell replication changed during recovery, we evaluated the fraction of GFRα1<sup>+</sup> cells that incorporated EdU (Figures 2A and 2C). A<sub>s</sub> cells exhibited the greatest response to resumption of GDNF signaling; cell replication was four times higher than in controls on day 14, but returned to control levels by day 18. Replication of A<sub>pr</sub> cells was only greater than controls on day 22. Replication of A<sub>al</sub> cells did not change significantly.

Our observation that replication of A<sub>s</sub> cells was not decreased after 9 days of inhibited GDNF signaling was unexpected, since it is decreased after 3 days (Parker et al., 2014). To confirm and expand our new result, we compared cell replication after 3 and 9 days of inhibited GDNF signaling (n = 5/group). Results (Figure 2D) showed that a significantly higher fraction of A<sub>s</sub> cells replicated after 9 days than after 3 days, while replication by controls was at an intermediate level.

Study 3: to determine labeling efficiency, we injected mice once or every other hour for 24 h with EdU (n = 3/group), collected samples 24 h after the first injection, and determined the fraction of cells labeled with EdU after 1 or 12 injections (Figure 3A). Labeling efficiency (fraction of cells labeled after 1 injection/fraction labeled after 12) was 0.35, 0.53, and 0.76 for A<sub>s</sub>, A<sub>pr</sub>, and A<sub>al</sub> cells, respectively.

Study 4: we used a classical approach to determine the average length of the cell cycle of A<sub>s</sub> cells, sequential injection of animals with two different thymidine analogs and

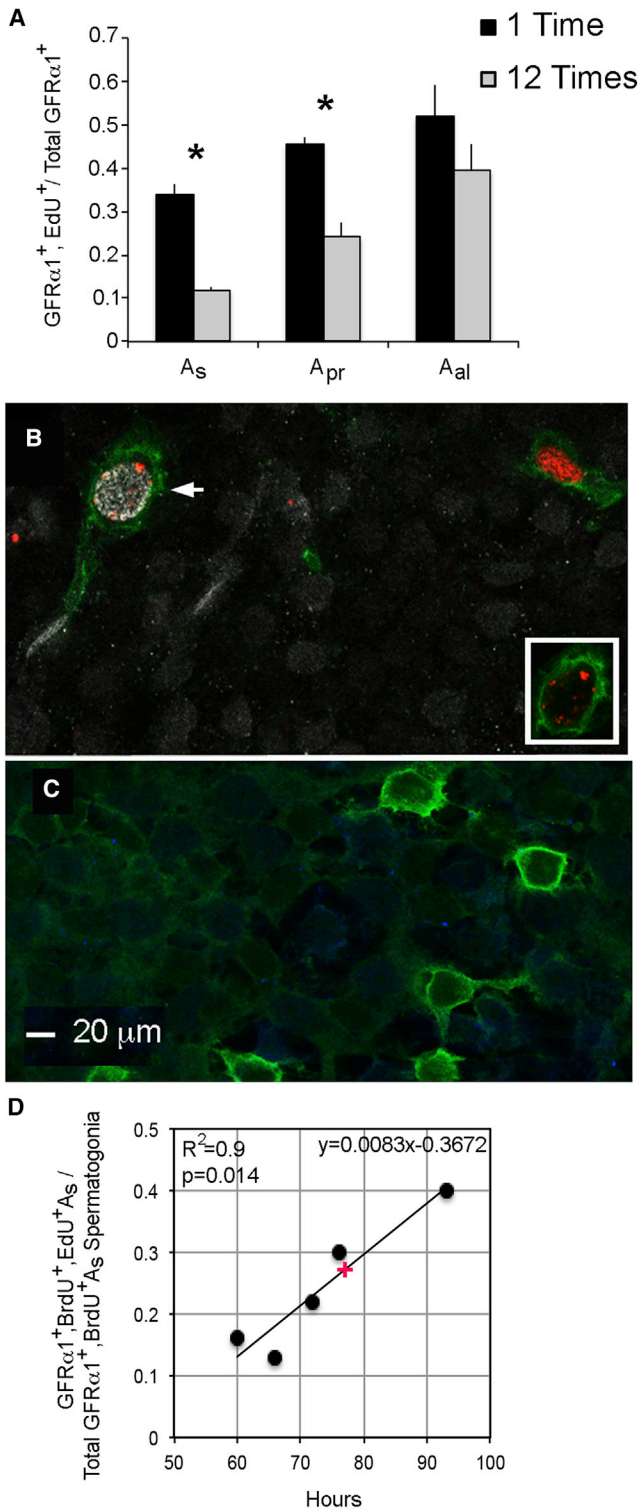

**Figure 3. Determinations of the Efficiency of Labeling GFRα1<sup>+</sup> A<sub>s</sub>, A<sub>pr</sub>, and A<sub>al</sub> Spermatogonia with EdU and of the Average Length of the Cell Cycle of GFRα1<sup>+</sup> A<sub>s</sub> Spermatogonia**

(A) Fractions of GFRα1<sup>+</sup> A<sub>s</sub>, A<sub>pr</sub>, and A<sub>al</sub> spermatogonia that were EdU<sup>+</sup> after 1 or 12 injections (n = 3/group). Tissues were collected

identification of the time interval producing dual-labeled cells. While Kanatsu-Shinohara et al. (2016) reported that the length of the cell cycle of CDH1<sup>+</sup> spermatogonia was 93.6 h, we performed this experiment because our mice have a different genetic background, SSCs are heterogeneous, cycle lengths of other stem cells can vary, and CDH1 expression spans A<sub>s</sub> to type A1 spermatogonia (Bragado Alonso et al., 2014; Kubota, 2019; Tokuda et al., 2007). We injected mice first with 5'-bromo-2'-deoxyuridine (BrdU) and then 60, 66, 72, 76, and 93 h later with EdU and collected tubules 2 h after the second injection (n = 1/time point). Those times spanned the reported lengths of the cell cycle of mouse CDH1<sup>+</sup> spermatogonia and of rat A<sub>s</sub> spermatogonia (Huckins, 1971; Kanatsu-Shinohara et al., 2016). Dual-labeled GFRα1<sup>+</sup> A<sub>s</sub> cells were observed at all five time points (Figure 3B). We detected no apparent labeling in negative control tubules (Figure 3C). To establish the average cell-cycle length, we enumerated GFRα1<sup>+</sup>, BrdU<sup>+</sup>, EdU<sup>+</sup>, A<sub>s</sub> cells and total GFRα1<sup>+</sup>, BrdU<sup>+</sup> A<sub>s</sub> cells at each time point, divided the former number by the latter, and plotted the resulting fractions against hours between injections (Figure 3D). This analysis revealed a linear, positive correlation between the fraction of cells that were dual-labeled and the time between injections. To estimate the average length of the cell cycle, we calculated the midpoint between the minimum and maximum fraction of double-labeled cells, and extrapolated from that midpoint an average cell cycle of 76.5 h, or 3.2 days.

Comparing cell yield with increased cell numbers: we used the data from Figure 2 to calculate cell densities and fraction of EdU-labeled A<sub>s</sub>, A<sub>pr</sub>, and A<sub>al</sub> cells for each 3.2-day interval after GDNF signaling resumed (Table S1). We assumed that numbers of replicating cells equaled cell

24 h after the first injection. Data are presented as mean + SEM. An asterisk denotes a significant difference between 1 and 12 injections.

(B) A GFRα1<sup>+</sup>, BrdU<sup>+</sup>, EdU<sup>+</sup> A<sub>s</sub> spermatogonium from an animal injected with BrdU (white), with EdU (red) 93 h later, and tubules collected 2 h later. The same cell is shown in the insert, but only signals for GFRα1 and EdU are shown. The BrdU<sup>-</sup>, EdU<sup>+</sup> cell in the upper right hand corner shows that anti-BrdU does not cross-react with EdU.

(C) GFRα1<sup>+</sup> A<sub>s</sub> spermatogonia in a control mouse that was injected neither with BrdU nor EdU but processed for both. Scale bar, 20 μm.

(D) Determination of the average length of the cell cycle of GFRα1<sup>+</sup> A<sub>s</sub> spermatogonia. Mice were injected with BrdU and then 60, 66, 72, 76, or 93 h later with EdU (n = 1 animal per time point). GFRα1<sup>+</sup>, BrdU<sup>+</sup>, EdU<sup>+</sup> A<sub>s</sub> spermatogonia and total GFRα1<sup>+</sup>, BrdU<sup>+</sup> A<sub>s</sub> spermatogonia were enumerated and the number of the first divided by the number of the second. The resulting fractions were plotted against hours between injections. We defined average cell-cycle length, 76.5 h, for GFRα1<sup>+</sup> A<sub>s</sub> spermatogonia from the midpoint on the line (see red +).

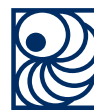

**Table 1. Calculated Yield of New Cells from Replication of GFR $\alpha$ 1<sup>+</sup> A<sub>s</sub>, A<sub>pr</sub>, and A<sub>al</sub> Spermatogonia from Days 10 to 28 versus Measured Increase in the Numbers of Those Cells**

| Cell Type                                                             | Calculated Yield <sup>a</sup> | Measured Increase <sup>a</sup> |
|-----------------------------------------------------------------------|-------------------------------|--------------------------------|
| GFR $\alpha$ 1 <sup>+</sup> A <sub>s</sub> spermatogonia <sup>b</sup> | 22.29                         | 14.25                          |
| GFR $\alpha$ 1 <sup>+</sup> A <sub>pr</sub> spermatogonia             | 37.74                         | 15.09                          |
| GFR $\alpha$ 1 <sup>+</sup> A <sub>al</sub> spermatogonia             | 140.95                        | 64.36                          |
| Total <sup>c</sup>                                                    | 200.98                        | 93.7                           |

<sup>a</sup>Data are presented as numbers of new cells/mm<sup>2</sup> of tubule surface.

<sup>b</sup>Predicted yield from replication of GFR $\alpha$ 1<sup>+</sup> A<sub>s</sub> spermatogonia exceeds the measured increase in their numbers.

<sup>c</sup>The sum of the predicted yields from the replication of all three cell types exceeds the sum of the measured increases in their cell numbers.

yield; yield = cells/mm<sup>2</sup> × (fraction of EdU<sup>+</sup> cells/labeling efficiency). Table 1 compares total cell yield with total increase in cell density from days 10 to 28. Replication of A<sub>s</sub> cells explains both the increase in their number and 53% of the increase of A<sub>pr</sub> cells. Replication of A<sub>pr</sub> cells accounts for 53% of the increase in A<sub>al</sub> cells, while A<sub>al</sub> cell replication explains the remainder. Yield from replication of A<sub>s</sub>, A<sub>pr</sub>, plus A<sub>al</sub> cells also exceed the sum of their increased numbers. Finally, Table S1 demonstrates that all remaining A<sub>s</sub> cells replicate within 4 days of resumed GDNF signaling. These results support the conclusions that self-renewing replication restores numbers of SSCs and that replication of SSCs and progenitors restores progenitors.

### When GDNF Signaling Resumes, Restoration is Initially Biased toward Formation of Progenitors

A<sub>al</sub> cells are the first to increase in number after GDNF signaling resumes, suggesting that the restorative process is initially biased toward formation of progenitors. We wondered if these cells were poised to become fully differentiated type A1 spermatogonia and thus expressed Kit. We treated mice for 9 days with 1NA-PP1, collected samples on days 10, 14, and 22, and enumerated cells expressing GFR $\alpha$ 1 or GFR $\alpha$ 1 plus Kit (Figures 4A–4C). Results show a significant overall effect of 1NA-PP1 treatment on the fraction of GFR $\alpha$ 1<sup>+</sup> cells that co-expressed Kit (Figure 4D). When counts for all three cell types were summed, the fraction of cells that co-expressed Kit at day 10 was 5.5-fold higher than in controls. By day 22, this fraction was reduced but still greater than control (Figure 4E).

### During Restoration, Increased SSC Replication is Not Associated with Increased GDNF Expression but with Numbers of SSCs and Progenitors

The marked spike on day 14 in A<sub>s</sub> cell replication suggested exposure to increased mitogenic stimuli. A likely candidate was GDNF, because changes in GDNF signaling affect repli-

cation of GFR $\alpha$ 1<sup>+</sup> A<sub>s</sub> spermatogonia within 2 days (Parker et al., 2014) and testicular content of GDNF mRNA is elevated after toxicant-induced death of SSCs (Carrieri et al., 2017; Zohni et al., 2012). Thus, we measured testicular GDNF protein and mRNA levels in controls after inhibition and following resumption of GDNF signaling. Neither increased, nor did transcripts encoding four other regulators of SSCs, FGF2, FGF8, CSF1, and CXCL12 (Figure S3) (DeFalco et al., 2015; Hasegawa and Saga, 2014; Oatley et al., 2009; Yang et al., 2013). Next, we used RNA sequencing to search for potential increases in expression of other growth factors. Analysis of control testes and testes collected at day 14 (n = 3/group) identified 15,721 transcripts with Ensemble IDs. Principal-component analysis showed that testicular transcriptomes of the two groups were highly similar (Figure S4). However, expression of 144 transcripts differed (false discovery rate < 0.05). None encoded a growth factor.

The lack of increased growth factor expression led us to look for any evidence of regulated replication of SSCs and progenitors. As SSCs appear to interact *in vitro*, we asked if data presented in Figures 2B and 2C revealed relationships *in vivo* between the densities of A<sub>s</sub>, A<sub>pr</sub>, and A<sub>al</sub> cells and their replications (Ebata et al., 2011). We pooled and log transformed data from individual animals and plotted the fraction of A<sub>s</sub>, A<sub>pr</sub>, or A<sub>al</sub> cells that incorporated EdU against their densities and the densities of the two other cell types. This analysis revealed highly significant negative correlations between the fraction of A<sub>s</sub> cells that replicated and densities of A<sub>s</sub>, A<sub>pr</sub>, and A<sub>al</sub> cells. However, replication of A<sub>pr</sub> or A<sub>al</sub> cells were not correlated with densities of the three cell types (Figures 5 and S5). These results suggest that A<sub>s</sub>, A<sub>pr</sub>, and A<sub>al</sub> cells, either directly or via another cell type, regulate replication of A<sub>s</sub> spermatogonia.

### Loss of SSCs Followed by Loss of Pachytene Spermatocytes Results in Dissolution of the Blood-Testis Barrier

In the Introduction, we proposed that 1NaPP1-treated Ret(V805A) mice model the human SCO syndrome. An important caveat is that loss of SSCs in these mice results in the same architectural deficit seen in human SCO syndrome, the failure of Sertoli cells to form a blood-testis barrier (Camatini et al., 1981). To evaluate this possibility, we focused on claudin 11 because it is not concentrated at appropriate sites in the human SCO testes, and because claudin 11 is required for Sertoli cells to form the barrier (Mazaud-Guittot et al., 2010; Stammer et al., 2016). We focused on tubules of treated mice that contained or lacked pachytene spermatocytes because of the report that these cells stimulate barrier formation (Li et al., 2018). Mice were treated with vehicle or with 1NA-PP1 for 9 days and tubules were collected 32 days later.

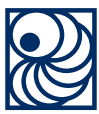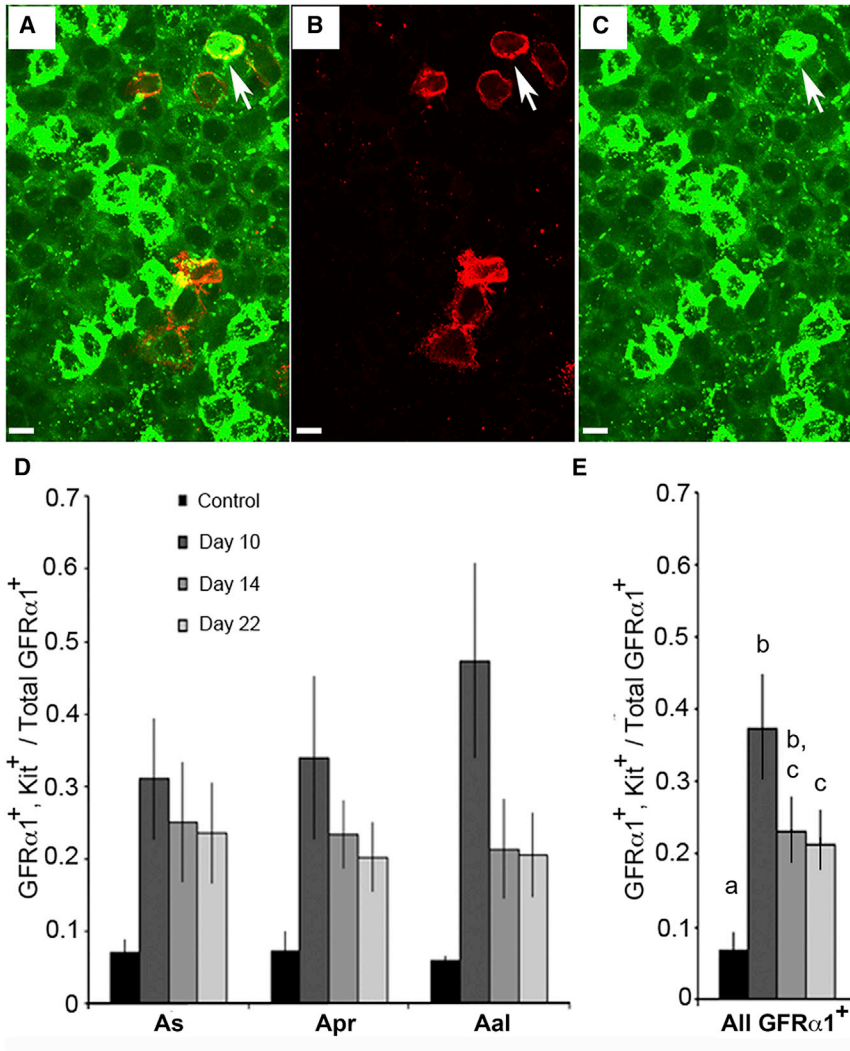

**Figure 4. After 9 Days of Inhibited GDNF Signaling, a Significant Fraction of GFR $\alpha$ 1<sup>+</sup> Spermatogonia Also Express the Differentiation Marker, Kit, but This Fraction Decreases Once GDNF Signaling Resumes**

Spermatogonia co-expressing GFR $\alpha$ 1 (red) and/or Kit (green) were identified by immunocytochemistry and confocal microscopy. Optical sections are 2  $\mu$ m thick. Scale bars, 20  $\mu$ m.

(A) Image with merged red and green channels. The arrow points to a cell expressing both proteins.

(B and C). Separate red (B) and green (C) channels.

(D). Fraction of GFR $\alpha$ 1<sup>+</sup> A<sub>s</sub>, A<sub>pr</sub>, and A<sub>al</sub> spermatogonia that co-expressed Kit. Mice were treated for 9 days with vehicle (control) or 1NA-PP1, and tubules analyzed on days 10, 14, 18, and 22. Data (mean  $\pm$  SEM; n = 9–11 mice/group) are presented for each cell type. ANOVA shows an overall significant effect of treatment.

(E). Fraction of all GFR $\alpha$ 1<sup>+</sup> spermatogonia that co-expressed Kit. Data were summed across cell types, and each mean compared with the other means. Different letters over bars denote significant differences between means.

Claudin 11 was detected by immunocytochemistry, and nuclei were stained with DAPI. In all tubules of control mice, optical cross-sections of seminiferous tubules revealed a ring of claudin 11 just above spermatogonia and early preleptotene spermatocytes, the site of the barrier (Figure 6A) (Mruk and Cheng, 2015). Identical results were obtained with tubules of treated animals that contained a full complement of spermatogenic cells or that contained pachytene spermatocytes but lacked round spermatids (Figure 6B). However, claudin 11 was not detected at the presumptive site of the barrier in tubules with very few pachytene spermatocytes but with round spermatids (Figure 6C). Neither could we reconstruct normal claudin 11 localization from serial optical sections (Figure 6D). Thus, the restoration of SSCs and the subsequent rebuilding of the seminiferous epithelium occur in a tissue that undergoes dissolution of its blood-testis barrier.

## DISCUSSION

Our principal goal was to test the hypothesis that inhibition of GDNF signaling caused a substantial loss of SSCs from the adult testis, which, upon resumption of signaling, were restored by self-renewing replication. We predicted that this loss of SSCs and the resulting maturation depletion of the seminiferous epithelium caused dissolution of the blood-testis barrier. Our data support both our hypothesis and our prediction. The loss of this barrier demonstrates that our mouse model recapitulates an important characteristic of human SCO syndrome.

### Most SSCs are Lost during 9 Days of Inhibited GDNF Signaling, but Are Partially Restored When it Resumes

We demonstrated that 9 days of inhibited GDNF signaling results in a 90% decrease in transplantable SSCs. We noted a similar decrease when we defined SSCs as A<sub>s</sub>



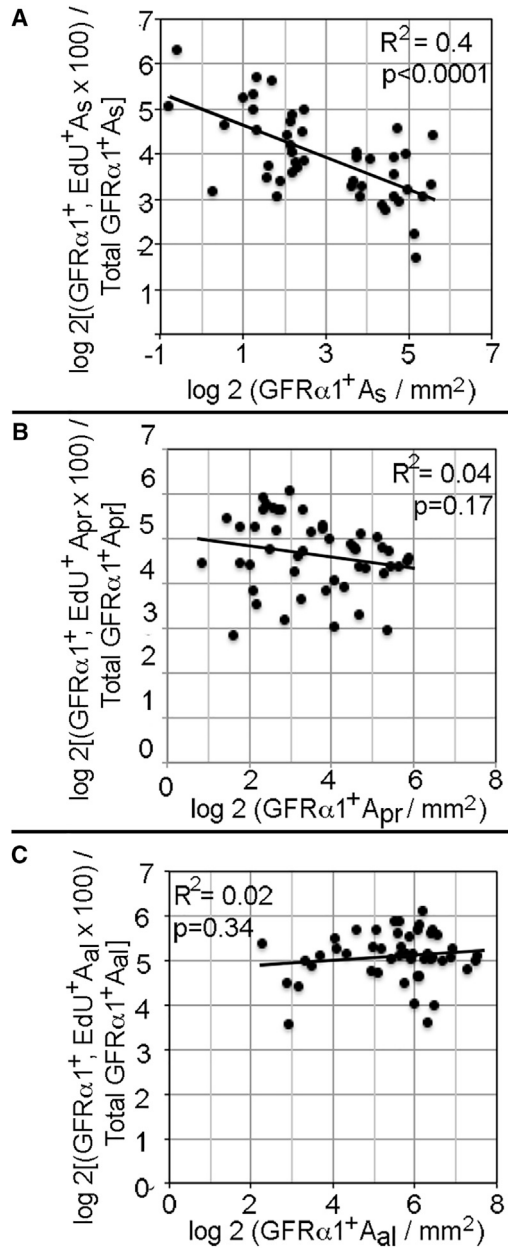

**Figure 5. The Replication of  $GFR\alpha 1^+$   $A_s$  Spermatogonia Decreases as Their Density Increases**

For each control and treated animal (Figures 2B and 2C), densities of  $GFR\alpha 1^+$   $A_s$ ,  $A_{pr}$ , and  $A_{al}$  spermatogonia and the  $Edu^+$  fractions of these cells were  $\log_2$  transformed and replication plotted against density.  $R^2$  and  $p$  values for each regression line are shown.

spermatogonia that expressed *Id4-eGFP* and/or  $GFR\alpha 1$ . This loss should be considered in the light of the report that adult mouse testes contain two different subpopulations of SSCs; one expresses  $GFR\alpha 1$ , the other does not (Garbuzov et al., 2018). As Ret expression by  $GFR\alpha 1^+$  SSCs is 16.5-fold higher than by  $GFR\alpha 1^-$  cells, the later

should be immune to 1NA-PP1 treatment. However, as the report also indicated that individual SSCs rapidly interconvert between  $GFR\alpha 1^-$  and  $GFR\alpha 1^+$  states, all SSCs in our studies should be affected by 9 days of treatment.

Our data show that, after resumption of GDNF signaling,  $A_{al}$  cells are the first to be restored and about 25% express Kit. Thus, the restorative process is biased initially toward regeneration of progenitor spermatogonia, some of which appear poised to become type A spermatogonia. However, after this initial phase, the SSC pool is substantially rebuilt.

Our analysis indicates that the total yield from replication of  $A_s$ ,  $A_{pr}$  and  $A_{al}$  cells exceeds the sum of the increases in their numbers. We propose that this apparent excess cell production is due to loss of  $GFR\alpha 1$  expression during differentiation of  $A_{al}$  cells. It is useful to view these results from the perspective of the simplest model for  $A_s$ ,  $A_{pr}$  and  $A_{al}$  spermatogonia (de Rooij, 2001). This model posits that replication of  $A_s$  spermatogonia generates either a new  $A_s$  spermatogonia or two  $A_{pr}$  spermatogonia. Replication of  $A_{pr}$  spermatogonia generates  $A_{al}$  cells, while the replication of  $A_{al}$  cells increases chain length. When viewed from this perspective, our data indicate that, following resumption of GDNF signaling, self-renewing replication of  $A_s$  spermatogonia restores all SSCs and the most immature,  $A_s$ , progenitor spermatogonia. However, replication of  $A_s$  cells accounts for only 53% of the restored  $A_{pr}$  cells. The remainder might be generated when two cells in a pair simultaneously replicate and the new chain of four cells splits into two pairs. Nonetheless, while we cannot fully explain how all  $A_{pr}$  cells are restored, our quantitative analysis supports the conclusion that, following the resumption of GDNF signaling, self-renewing replication of  $GFR\alpha^+$   $A_s$  spermatogonia, acting as SSCs, rebuilds the stem cell pool. This process differs markedly from those proposed to restore SSCs following busulfan-induced testicular damage (Carrieri et al., 2017; La et al., 2018).

### The Regulators of SSC Restoration

The rebuilding of the stem cell pool after GDNF signaling resumption raises the issue of how this process is regulated. The fact that all remaining  $GFR\alpha 1^+$   $A_s$  spermatogonia replicated within 3–4 days of resumed signaling suggested that the concentration of an important regulator of SSC proliferation was altered. GDNF was a likely candidate because multiple studies report increased GDNF expression by Sertoli cells following busulfan-induced spermatogonial death (Anand et al., 2016; Zohni et al., 2012). We, therefore, were surprised that testicular levels of GDNF protein and mRNA were not increased in mice that had lost 90% of SSCs. The likely reason for our apparently unique result is that SSCs are lost to differentiation, while in the other studies SSCs die (Choi et al., 2004). Sertoli cells express Toll-like

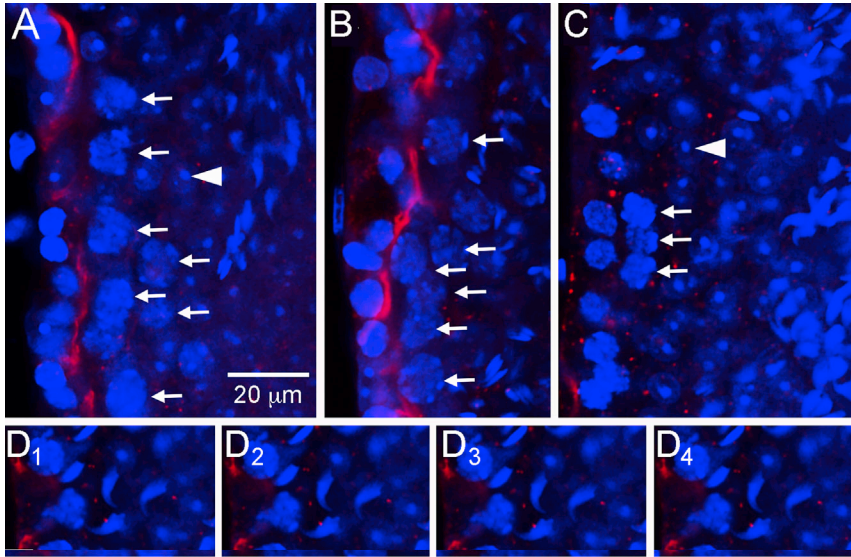

### Figure 6. Loss of Pachytene Spermatocytes that Follows Loss of SSCs Results in Dissolution of the Blood-Testis Barrier

Mice were injected with vehicle or 1NA-PP1 for 9 days and testes collected 32 days later. Whole seminiferous tubules were immunostained for claudin 11 (red) and with DAPI (blue) and imaged by confocal microscopy. Thicknesses of the optical sections for the red and blue channels were 2.2 and 0.9  $\mu\text{m}$ , respectively. An arrow points to each of the pachytene spermatocytes in (A–C); arrowheads point to a nucleolus of one of the round spermatids in (A and C). Scale bar, 20  $\mu\text{m}$  (all panels).

(A) Optical section through a middle of a seminiferous tubule of a control animal. This tubule contains a full complement of spermatogenic cells. Identical results were obtained from tubules of treated animals

that contained a full complement of germ cells. In all such tubules, claudin 11 is concentrated at the site of the blood-testis barrier. (B) Optical section through the middle of a seminiferous tubule of a treated animal. This tubule contains many pachytene spermatocytes but no round spermatids. Claudin 11 localization is normal.

(C) Optical section through the middle of a seminiferous tubule of a treated animal. This tubule contains few pachytene spermatocytes but many round spermatids. Claudin 11 is present in small puncta, not at the presumptive site of the blood-testis barrier. This animal was also the source of the tubule shown in (B).

(D) Optical sections separated by 4  $\mu\text{m}$  through a tubule, lacking pachytene spermatocytes, in a treated animal.

receptors and apoptosis of germ cells generates ligands for those receptors. It has been proposed that the binding of those ligands to their cognate receptors stimulates Sertoli cell GDNF expression, Wnt signaling, and pro-inflammatory pathways (Anand et al., 2016; Zhang et al., 2013; Zohni et al., 2012).

We detected no significant changes in expression of any other known growth factor or cytokine regulator of SSC replication. However, replication of  $\text{GFR}\alpha 1^+$   $A_s$  spermatogonia decreased as their densities and those of  $\text{GFR}\alpha 1^+$   $A_{pr}$  and  $A_{al}$  spermatogonia increased, indicating that restoration is regulated. This regulation is specific for replications of  $A_{pr}$  and  $A_{al}$  spermatogonia do not correlate with cell densities. One possible explanation for our data is that these three cell types secrete an inhibitor of SSC proliferation, whose testicular concentration increases as SSCs and progenitor spermatogonia are restored. Consistent with our proposal is the fact that SSCs express a number of cytokines and adhesion molecules as well as their cognate receptors (Green et al., 2018; Guo et al., 2017). It is also supported by the report that *in vitro* the clustering of SSCs into mounds suppresses their stem cell activity (Ebata et al., 2011). However, it is possible that interactions that regulate SSC replication are indirect, requiring the action of intermediaries, such as Sertoli or peritubular myoid cells, which secrete the proliferation inhibitor. Identifying

both this inhibitor and its source are important future objectives.

### Loss of SSCs Followed by Loss of Pachytene Spermatocytes Results in Dissolution of the Blood-Testis Barrier

Human SCO syndrome is characterized by the inability of adjacent Sertoli cells to form a functional barrier (Camatini et al., 1981). An important cause of this deficit is the Sertoli cell's inability to concentrate an essential barrier component, claudin 11, at the correct site (Mazaud-Guittot et al., 2010; Stammler et al., 2016). Therefore, it is noteworthy that SCO mouse tubules neither properly concentrate claudin-11 nor form a barrier (Li et al., 2018). We observed that claudin 11 was mislocalized in tubules with reduced numbers of pachytene spermatocytes but with round spermatids, while claudin 11 was correctly localized in tubules with pachytene spermatocytes but without round spermatids.

### Conclusion and Relevance to Human SCO Syndrome

Our results demonstrate that inhibition of GDNF signaling for 9 days results in loss of 90% of SSCs. Upon the resumption of this signaling, numbers of these stem cells and of their immediate progeny, progenitor spermatogonia, are substantially restored. This restoration is initially biased



toward formation of progenitor spermatogonia, some of which express Kit, and thus are primed to become fully differentiated type A1 spermatogonia. However, within 2 months of renewed signaling, SSC restoration is sufficient to support normal, complete spermatogenesis in about 50% of tubule cross-sections. This restoration is driven by self-renewing stem cell replication. In fact, immediately after GDNF signaling resumes, all remaining  $GFR\alpha 1^+$  A<sub>s</sub> spermatogonia replicate. This event is not associated with elevated expression of GDNF or of four other growth factors. However, our data suggest that SSC replication is regulated directly or indirectly by feedback from other SSCs or from progenitor spermatogonia. Finally, our results demonstrate that loss of SSCs and subsequent maturation depletion of pachytene spermatocytes causes dissolution of the blood-testis barrier. Thus, our mouse model recapitulates important characteristics of human SCO testes: loss of SSCs due to inadequate GDNF signaling and dissolution of the blood-testis barrier.

Our results raise hope for the development of new therapies for the subset of infertile men with SCO syndrome, whose testes contain some SSCs. It is possible that increasing their testicular GDNF levels will stimulate replication of the few SSCs in their testis, thereby increasing stem cell numbers and seeding spermatogenesis in previously germ cell-deficient areas of tubule.

## EXPERIMENTAL PROCEDURES

### Animals

The Johns Hopkins University and University of Pittsburgh Medical School Animal Care the Use Committees approved relevant animal protocols. All mice used to study the response to the inhibition and resumption of GDNF signaling were homozygous for Ret  $V805A^{+/+}$ , had a C57BL/6J genetic background, and were aged 90–120 days (Savitt et al., 2012). Mice used to estimate numbers of transplantable SSCs were generated by crossing Ret  $V805A^{+/+}$  with B6129S7-Gt (Rosa) $^{+/-}$  26Sor/J mice,  $Id4-eGFP^{+/-}$  mice (Jackson Laboratory, Bar Harbor, ME). Offspring carrying both transgenes were backcrossed seven times to Ret( $V805A$ ) mice. We used C57BL/6J mice (Jackson Laboratory) to determine EdU-labeling efficiency and cell-cycle length. [Supplemental Experimental Procedures](#) describe protocols for injection of 1NaPP1, EdU, and BrdU, as well as primers and conditions for detection of transgenes.

### Synthesis of 1NA-PP1-HCl

We synthesized 1NA-PP1-HCl as described previously (Savitt et al., 2012). For brevity we call it 1NA-PP1 throughout the paper.

### Transplantation of Germ Cells into Germ Cell-Deficient Testes

Two to 4 days after the last injection of 1NA-PP1 or vehicle, a single-cell suspension was generated from each testis of treated and

control animals, and approximately 800,000 viable cells were transplanted into the seminiferous tubules of germ cell-deficient, busulfan-treated C57BL/6 mice, as described previously (Medrano et al., 2014). Recipients were analyzed 2 months later by incubating fixed, decapsulated testes in 5-bromo-4-chloro-3-indolyl-b-D-galactopyranoside (X-gal) and counting X-Gal<sup>+</sup> spermatogenic colonies. Very few incomplete colonies or patches were observed.

### Immunocytochemistry, Histology, Microscopy, and Image Analysis

We used previously described methods to detect  $GFR\alpha 1$ , ZBTB16, Kit, and EdU (Parker et al., 2014; Savitt et al., 2012). Antibodies are listed in [Table S2](#). Whole mounts of seminiferous tubules were imaged using Zeiss LSM700 or LSM710 confocal microscopes. ZBTB16<sup>+</sup> cells were imaged as described previously (Savitt et al., 2012). [Supplemental Experimental Procedures](#) describe how we detected claudin 11 and BrdU. One-micron, plastic-embedded testis sections were prepared as described (Savitt et al., 2012).

### Quantification of Specific Transcripts and of GDNF Protein in Mouse Testes

Testis GDNF protein and growth factor mRNA concentrations were assayed as described previously (Parker et al., 2014; Savitt et al., 2012; Singh et al., 2017). Transcript and GDNF protein levels were normalized for 18S rRNA and total protein, respectively (Bradford, 1976). [Supplemental Experimental Procedures](#) provide full protocols.

### Statistical Analyses

Data were analyzed by two-tailed t tests, ANOVA, or correlation using GraphPad Prism 6.0 (La Jolla, CA). Post hoc comparisons were performed with the Holm-Side's multiple comparison test. Statistically significant differences were defined as  $p \leq 0.05$ .

### Data and Code Availability

The RNA sequencing data were uploaded to the GEO (GEO: GSE111487).

### SUPPLEMENTAL INFORMATION

Supplemental Information can be found online at <https://doi.org/10.1016/j.stemcr.2021.01.015>.

### AUTHOR CONTRIBUTIONS

N.P. performed most experiments and wrote the first manuscript draft. A.L. analyzed cell differentiation. M.S. performed stem cell transplants. K.E.O. supervised M.S. and edited the manuscript drafts. J.M.O. provided  $Id4-eGFP$  mice and edited the manuscript drafts. C.Z. and F.U.R. synthesized 1NaPP1-HCl. K.S. directed 1NaPP1-HCl synthesis and discussed the results. W.W.W. directed the research, performed and analyzed the experiments, and wrote all but the first manuscript draft.

### CONFLICTS OF INTEREST

The authors declare no competing interests.



## ACKNOWLEDGMENTS

This research was supported by the Eunice Kennedy Shriver National Institute of Child Health and Human Development, National Centers for Translational Research in Reproduction and Infertility Program (NCTRI) grant 1R01HD074542. RNA sequencing was performed by Dr. Jen Grenier, Cornell University Sequencing Core, Center for Reproductive Genomics. The center is supported in part by a grant from the NCTRI, P50HD076210. We thank Pamela Wright for editorial and graphical assistance and Janet Folmer for histology. We thank Dr. Manju Sharma and Dr. Bob Braun for providing their protocol for detecting BrdU<sup>+</sup>, EdU<sup>+</sup> cells.

Received: July 3, 2018

Revised: January 25, 2021

Accepted: January 26, 2021

Published: February 25, 2021

## REFERENCES

- Anand, S., Bhartiya, D., Sriraman, K., and Mallick, A. (2016). Underlying mechanisms that restore spermatogenesis on transplanting healthy niche cells in busulphan treated mouse testis. *Stem Cell Rev. Rep.* *12*, 682–697.
- Bradford, M.M. (1976). A rapid and sensitive method for the quantitation of microgram quantities of protein utilizing the principle of protein-dye binding. *Anal. Biochem.* *72*, 248–254.
- Bragado Alonso, S., Schulze-Steikow, M., and Calegari, F. (2014). Cell cycle activity of neural precursors in the diseased mammalian brain. *Front. Neurosci.* *8*, 39.
- Buaas, F.W., Kirsh, A.L., Sharma, M., McLean, D.J., Morris, J.L., Griswold, M.D., de Rooij, D.G., and Braun, R.E. (2004). Plzf is required in adult male germ cells for stem cell self-renewal. *Nat. Genet.* *36*, 647–652.
- Camatini, M., Franchi, E., and Decurtis, I. (1981). Permeability to lanthanum of blood testis barrier in human germinal aplasia. *Anat. Rec.* *200*, 293–297.
- Carrieri, C., Comazzetto, S., Grover, A., Morgan, M., Buness, A., Nerlov, C., and O'Carroll, D. (2017). A transit-amplifying population underpins the efficient regenerative capacity of the testis. *J. Exp. Med.* *214*, 1631–1641.
- Cheraghali, A.M., Kumar, R., Knaus, E.E., and Wiebe, L.I. (1995). Pharmacokinetics and bioavailability of 5-ethyl-2'-deoxyuridine and its novel (5R,6R)-5-bromo-6-ethoxy-5,6-dihydro prodrugs in mice. *Drug Metab. Dispos.* *23*, 223–226.
- Choi, Y.J., Ok, D.W., Kwon, D.N., Chung, J.I., Kim, H.C., Yeo, S.M., Kim, T., Seo, H.G., and Kim, J.H. (2004). Murine male germ cell apoptosis induced by busulfan treatment correlates with loss of c-kit-expression in a Fas/FasL- and p53-independent manner. *FEBS Lett.* *575*, 41–51.
- de Rooij, D.G. (2001). Proliferation and differentiation of spermatogonial stem cells. *Reproduction* *121*, 347–354.
- de Rooij, D.G. (2017). The nature and dynamics of spermatogonial stem cells. *Development* *144*, 3022–3030.
- DeFalco, T., Potter, S.J., Williams, A.V., Waller, B., Kan, M.J., and Capel, B. (2015). Macrophages contribute to the spermatogonial niche in the adult testis. *Cell Rep.* *12*, 1107–1119.
- Ebata, K.T., Yeh, J.R., Zhang, X., and Nagano, M.C. (2011). Soluble growth factors stimulate spermatogonial stem cell divisions that maintain a stem cell pool and produce progenitors in vitro. *Exp. Cell Res.* *317*, 1319–1329.
- Farlik, M., Sheffield, N.C., Nuzzo, A., Datlinger, P., Schonegger, A., Klughammer, J., and Bock, C. (2015). Single-cell DNA methylome sequencing and bioinformatic inference of epigenomic cell-state dynamics. *Cell Rep.* *10*, 1386–1397.
- Garbuzov, A., Pech, M.F., Hasegawa, K., Sukhwani, M., Zhang, R.J., Orwig, K.E., and Artandi, S.E. (2018). Purification of GFRalpha1+ and GFRalpha1– spermatogonial stem cells reveals a niche-dependent mechanism for fate determination. *Stem Cell Reports* *10*, 553–567.
- Green, C.D., Ma, Q., Manske, G.L., Shami, A.N., Zheng, X., Marini, S., Moritz, L., Sultan, C., Gurczynski, S.J., Moore, B.B., et al. (2018). A comprehensive roadmap of murine spermatogenesis defined by single-cell RNA-seq. *Dev. Cell* *46*, 651–667 e610.
- Guo, J., Grow, E.J., Yi, C., Mlcochova, H., Maher, G.J., Lindskog, C., Murphy, P.J., Wike, C.L., Carrell, D.T., Goriely, A., et al. (2017). Chromatin and single-cell RNA-seq profiling reveal dynamic signaling and metabolic transitions during human spermatogonial stem cell development. *Cell Stem Cell* *21*, 533–546 e536.
- Hasegawa, K., and Saga, Y. (2014). FGF8-FGFR1 signaling acts as a niche factor for maintaining undifferentiated spermatogonia in the mouse. *Biol. Reprod.* *91*, 145.
- Helsel, A.R., Yang, Q.E., Oatley, M.J., Lord, T., Sablitzky, F., and Oatley, J.M. (2017). ID4 levels dictate the stem cell state in mouse spermatogonia. *Development* *144*, 624–634.
- Huckins, C. (1971). The spermatogonial stem cell population in adult rats II. A radioautographic analysis of their cell cycle properties. *Cell Tissue Kinet.* *4*, 313–334.
- Kanatsu-Shinohara, M., Naoki, H., and Shinohara, T. (2016). Nonrandom germline transmission of mouse spermatogonial stem cells. *Dev. Cell* *38*, 248–261.
- Kubota, H. (2019). Heterogeneity of spermatogonial stem cells. In *Stem Cells Heterogeneity in Different Organs*, A. Birbrair, ed. (Springer International Publishing), pp. 225–242.
- La, H.M., Makela, J.A., Chan, A.L., Rossello, F.J., Nefzger, C.M., Legend, J.M.D., De Seram, M., Polo, J.M., and Hobbs, R.M. (2018). Identification of dynamic undifferentiated cell states within the male germline. *Nat. Commun.* *9*, 2819.
- Li, X.Y., Zhang, Y., Wang, X.X., Jin, C., Wang, Y.Q., Sun, T.C., Li, J., Tang, J.X., Batool, A., Deng, S.L., et al. (2018). Regulation of blood-testis barrier assembly in vivo by germ cells. *FASEB J.* *32*, 1653–1664.
- Lord, T., and Oatley, J.M. (2018). Functional assessment of spermatogonial stem cell purity in experimental cell populations. *Stem Cell Res.* *29*, 129–133.
- Mazaud-Guittot, S., Meugnier, E., Pesenti, S., Wu, X., Vidal, H., Gow, A., and Le Magueresse-Battistoni, B. (2010). Claudin 11 deficiency in mice results in loss of the Sertoli cell epithelial phenotype in the testis. *Biol. Reprod.* *82*, 202–213.

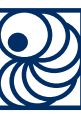

- Medrano, J.V., Martinez-Arroyo, A.M., Sukhwani, M., Noguera, I., Quinonero, A., Martinez-Jabaloyas, J.M., Pellicer, A., Remohi, J., Orwig, K.E., and Simon, C. (2014). Germ cell transplantation into mouse testes procedure. *Fertil. sterility* *102*, e11–12.
- Meng, X., Lindahl, M., Hyvonen, M.E., Parvinen, M., de Rooij, D.G., Hess, M.W., Raatikainen-Ahokas, A., Sainio, K., Rauvala, H., Lakso, M., et al. (2000). Regulation of cell fate decision of undifferentiated spermatogonia by GDNF. *Science* *287*, 1489–1493.
- Mruk, D.D., and Cheng, C.Y. (2015). The mammalian blood-testis barrier: its biology and regulation. *Endocr. Rev.* *36*, 564–591.
- Nakagawa, T., Sharma, M., Nabeshima, Y.I., Braun, R.E., and Yoshida, S. (2010). Functional hierarchy and reversibility within the murine spermatogenic stem cell compartment. *Science* *328*, 62–67.
- Oatley, J.M., Oatley, M.J., Avarbock, M.R., Tobias, J.W., and Brinster, R.L. (2009). Colony stimulating factor 1 is an extrinsic stimulator of mouse spermatogonial stem cell self-renewal. *Development* *136*, 1191–1199.
- Paduch, D.A., Hilz, S., Grimson, A., Schlegel, P.N., Jedlicka, A.E., and Wright, W.W. (2019). Aberrant gene expression by Sertoli cells in infertile men with Sertoli cell-only syndrome. *PLoS One* *14*, e0216586.
- Parker, N., Falk, H., Singh, D., Fidaleo, A., Smith, B., Lopez, M.S., Shokat, K.M., and Wright, W.W. (2014). Responses to glial cell line-derived neurotrophic factor change in mice as spermatogonial stem cells form progenitor spermatogonia which replicate and give rise to more differentiated progeny. *Biol. Reprod.* *91*, 92.
- Sada, A., Hasegawa, K., Pin, P.H., and Saga, Y. (2012). NANOS2 acts downstream of glial cell line-derived neurotrophic factor signaling to suppress differentiation of spermatogonial stem cells. *Stem Cells* *30*, 280–291.
- Savitt, J., Singh, D., Zhang, C., Chen, L.C., Folmer, J., Shokat, K.M., and Wright, W.W. (2012). The in vivo response of stem and other undifferentiated spermatogonia to the reversible inhibition of glial cell line-derived neurotrophic factor signaling in the adult. *Stem Cells* *30*, 732–740.
- Schlegel, P.N. (2004). Causes of azoospermia and their management. *Reprod. Fertil. Dev.* *16*, 561–572.
- Sharma, M., Srivastava, A., Fairfield, H.E., Bergstrom, D., Flynn, W.F., and Braun, R.E. (2019). Identification of EOMES-expressing spermatogonial stem cells and their regulation by PLZF. *ife* *8*, e43352.
- Singh, D., Paduch, D.A., Schlegel, P.N., Orwig, K.E., Mielnik, A., Bolyakov, A., and Wright, W.W. (2017). The production of glial cell line-derived neurotrophic factor by human sertoli cells is substantially reduced in Sertoli cell-only testes. *Hum. Reprod.* *32*, 1108–1117.
- Stammler, A., Luftner, B.U., Kliesch, S., Weidner, W., Bergmann, M., Middendorff, R., and Konrad, L. (2016). Highly conserved testicular localization of claudin-11 in normal and impaired spermatogenesis. *PLoS One* *11*, e0160349.
- Tokuda, M., Kadokawa, Y., Kurahashi, H., and Marunouchi, T. (2007). CDH1 is a specific marker for undifferentiated spermatogonia in mouse testes. *Biol. Reprod.* *76*, 130–141.
- Yang, Q.E., Kim, D., Kaucher, A., Oatley, M.J., and Oatley, J.M. (2013). CXCL12-CXCR4 signaling is required for the maintenance of mouse spermatogonial stem cells. *J. Cell Sci.* *126*, 1009–1020.
- Zhang, X., Wang, T., Deng, T., Xiong, W., Lui, P., Li, N., Chen, Y., and Han, D. (2013). Damaged spermatogenic cells induce inflammatory gene expression in mouse Sertoli cells through the activation of Toll-like receptors 2 and 4. *Mol. Cell. Endocrinol.* *365*, 162–173.
- Zohni, K., Zhang, X., Tan, S.L., Chan, P., and Nagano, M.C. (2012). The efficiency of male fertility restoration is dependent on the recovery kinetics of spermatogonial stem cells after cytotoxic treatment with busulfan in mice. *Hum. Reprod.* *27*, 44–53.

**Stem Cell Reports, Volume 16**

**Supplemental Information**

**Spermatogonial Stem Cell Numbers Are Reduced by Transient Inhibition of GDNF Signaling but Restored by Self-Renewing Replication when Signaling Resumes**

**Nicole Parker, Andrew Laychur, Meena Sukwani, Kyle E. Orwig, Jon M. Oatley, Chao Zhang, Florentine U. Rutaganira, Kevan Shokat, and William W. Wright**

### Supplemental Figures

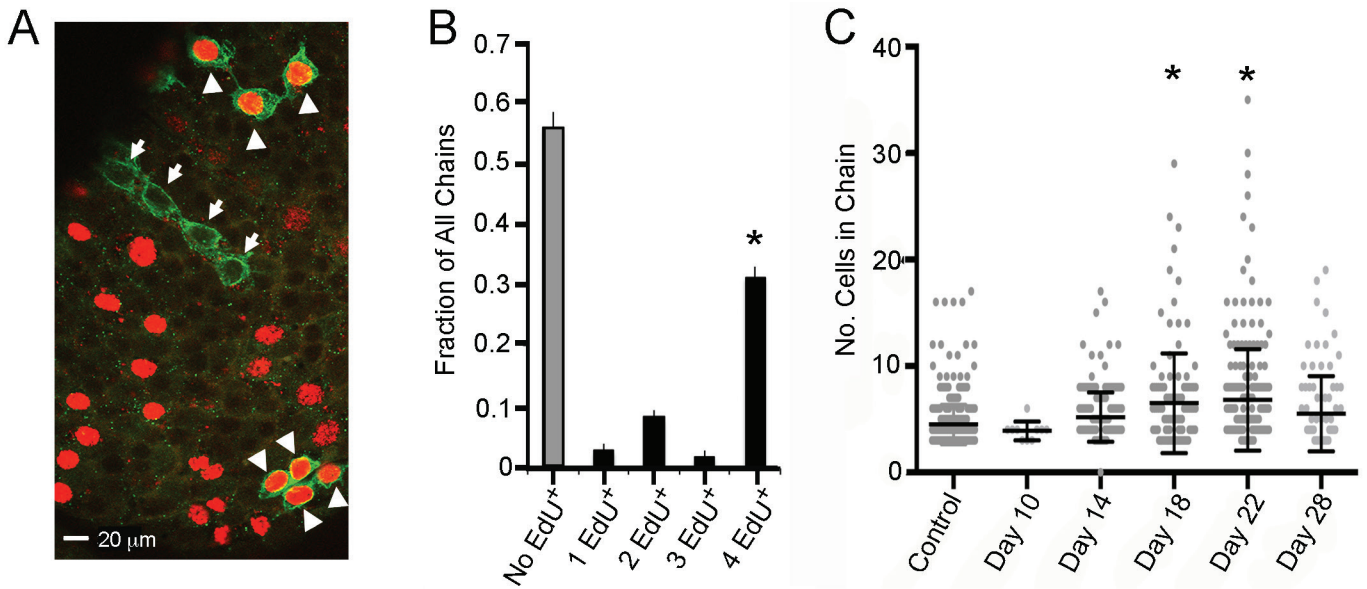

Figure S1. Characterization of chains of  $GFR\alpha1^+$   $A_{al}$  spermatogonia. Related to Figure 2A. **A**. Confocal micrograph of a whole mount of a seminiferous tubule collected 24 hours after injecting a C57BL/6J mouse with EdU (red).  $A_{al}$  spermatogonia are identified by their expression of the cell surface stem cell marker,  $GFR\alpha1$  (green), and by the fact that their plasma membranes make direct physical contact. All cells in two of the chains incorporated EdU (arrow heads), none of the cells in the third chain incorporated EdU (arrows). **B**. Fraction of all chains of 4  $A_{al}$  spermatogonia that contained no EdU<sup>+</sup> cells or 1 to 4 EdU<sup>+</sup> cells. Data (Mean+SEM) were obtained by analyzing tubules of 5 C57BL/6J mice. Asterisk indicates that there were significantly more chains with 4EdU<sup>+</sup> cells than with 1,2 or 3 EdU<sup>+</sup> cells. **C**. Numbers of  $GFR\alpha1^+$   $A_{al}$  spermatogonia per chain in tubules of Ret(V805) mice that were injected with vehicle (control) or with 1NA-PP1 for 9 days. Tubules were collected on days 10, 14, 18, 22 and 28 of the experiment. Data are presented as numbers of cells in individual chains (gray dots) and as the mean + SEM chain length for the entire group. An asterisk over a specific experimental group identifies the mean number of cells per chain in that group as significantly greater than the mean number of cells per chain in control animals.

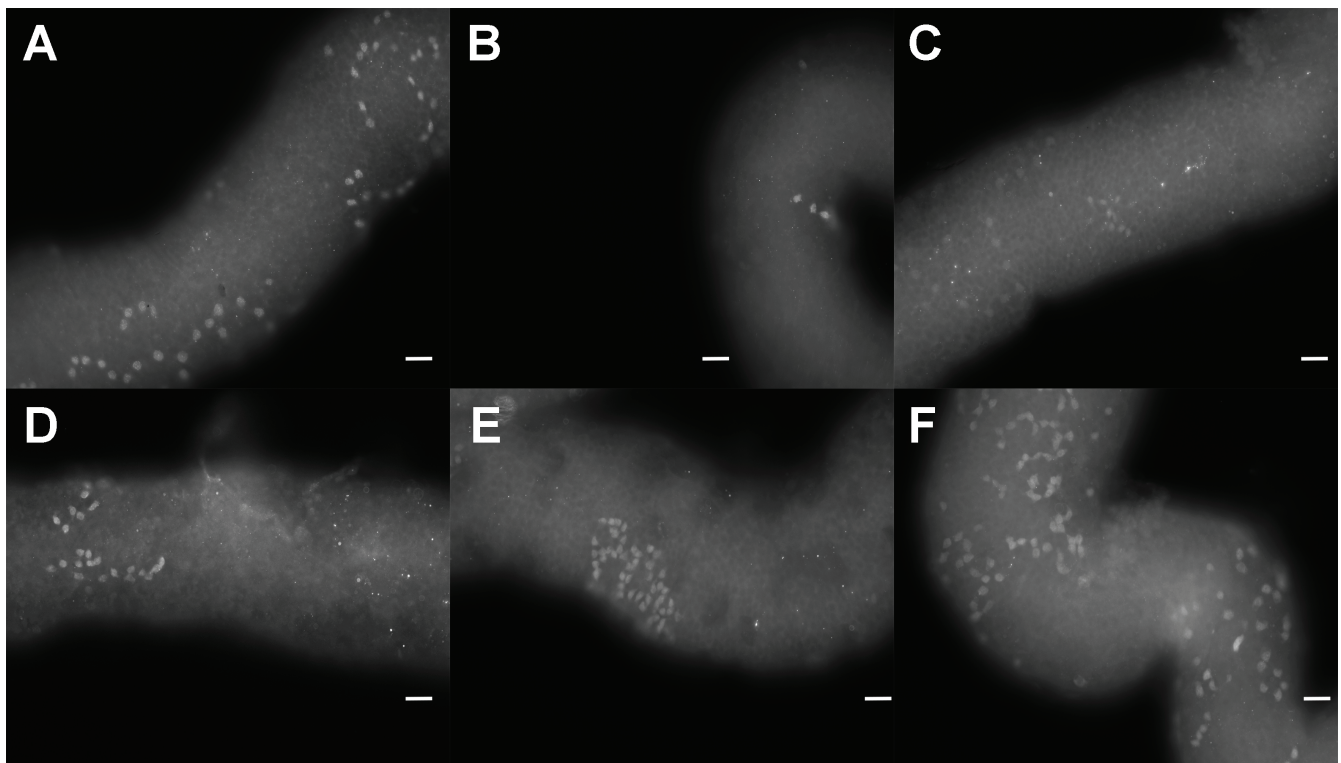

Figure S2. Loss and restoration of  $ZBTB16^+$  spermatogonia in seminiferous tubules of Ret(V805A) mice that were injected for 9 days with vehicle (A) or with 1NA-PP1 and tubules collected on days 10 (B), 14 (C), 18 (D), 22 (E) and 28 (F) of the experiment. Images were captured by standard fluorescence microscopy. This figure is related to Figures 2A and 2B. Bars = 80 $\mu$ m

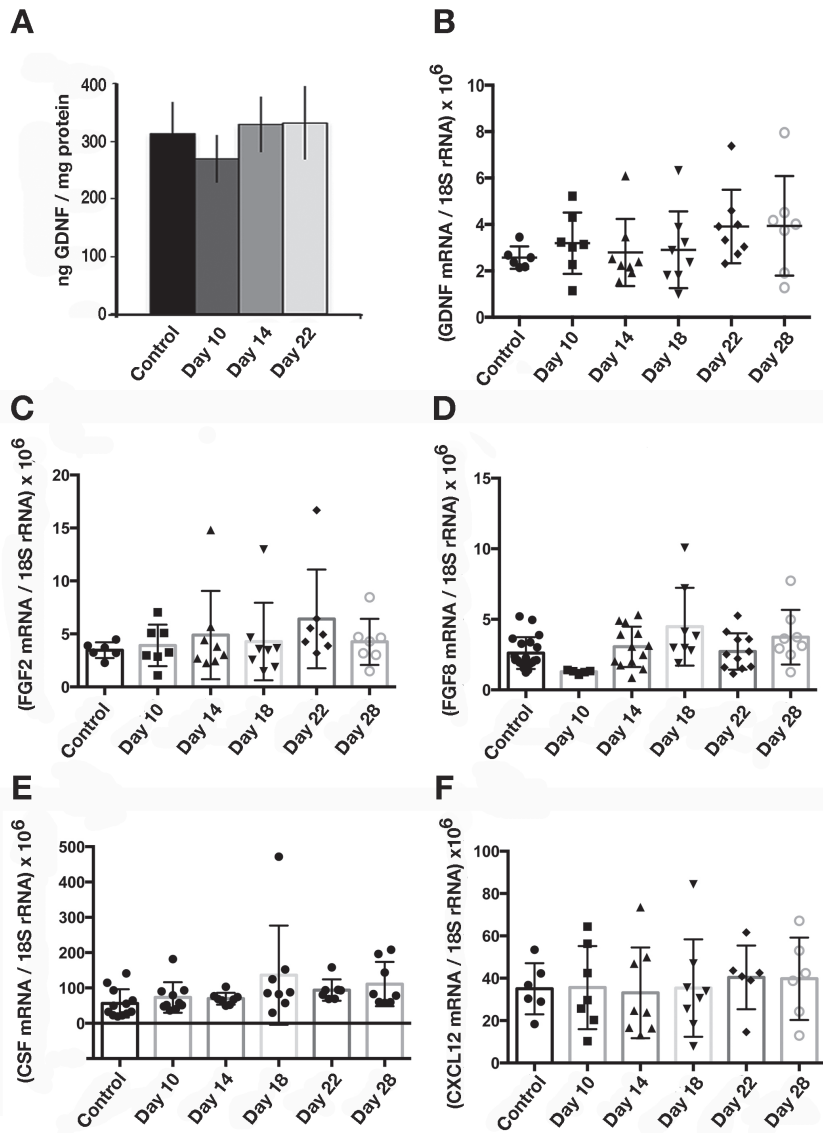

Figure S3. Testicular expression of GDNF protein (A) GDNF mRNA(B), FGF2 mRNA (C), FGF8 mRNA (D), CSF mRNA (E) and CXCL2 mRNA (F) in Ret(V805A) mice injected with vehicle or with 1NA-PP1 for 9 days. This figure is related to Figure 5. Animals were sacrificed on days 10, 14, 18, 22 and 28 of the experiment. GDNF protein levels were normalized to total cytosolic protein; transcripts levels were normalized to 18S rRNA. Data for transcript expression are presented both for individual testes and as mean  $\pm$  SEM of the group.

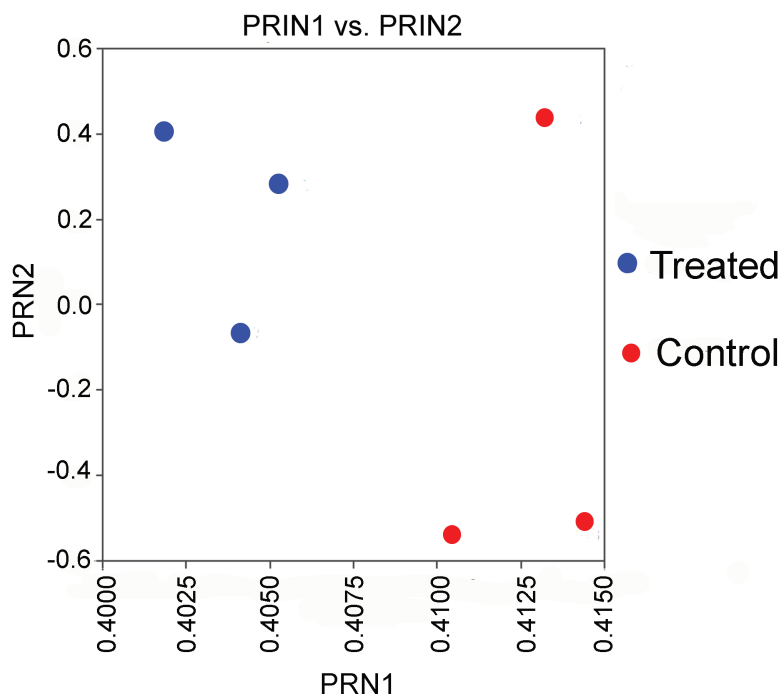

Figure S4. Principal component analysis of the testicular transcriptomes of Ret(V805A) mice that were injected for 9 days with vehicle (Control) or with 1NaPP1 (Treated). This figure is related to figure 5. Testes were collected and analyzed 5 days after the last injection.



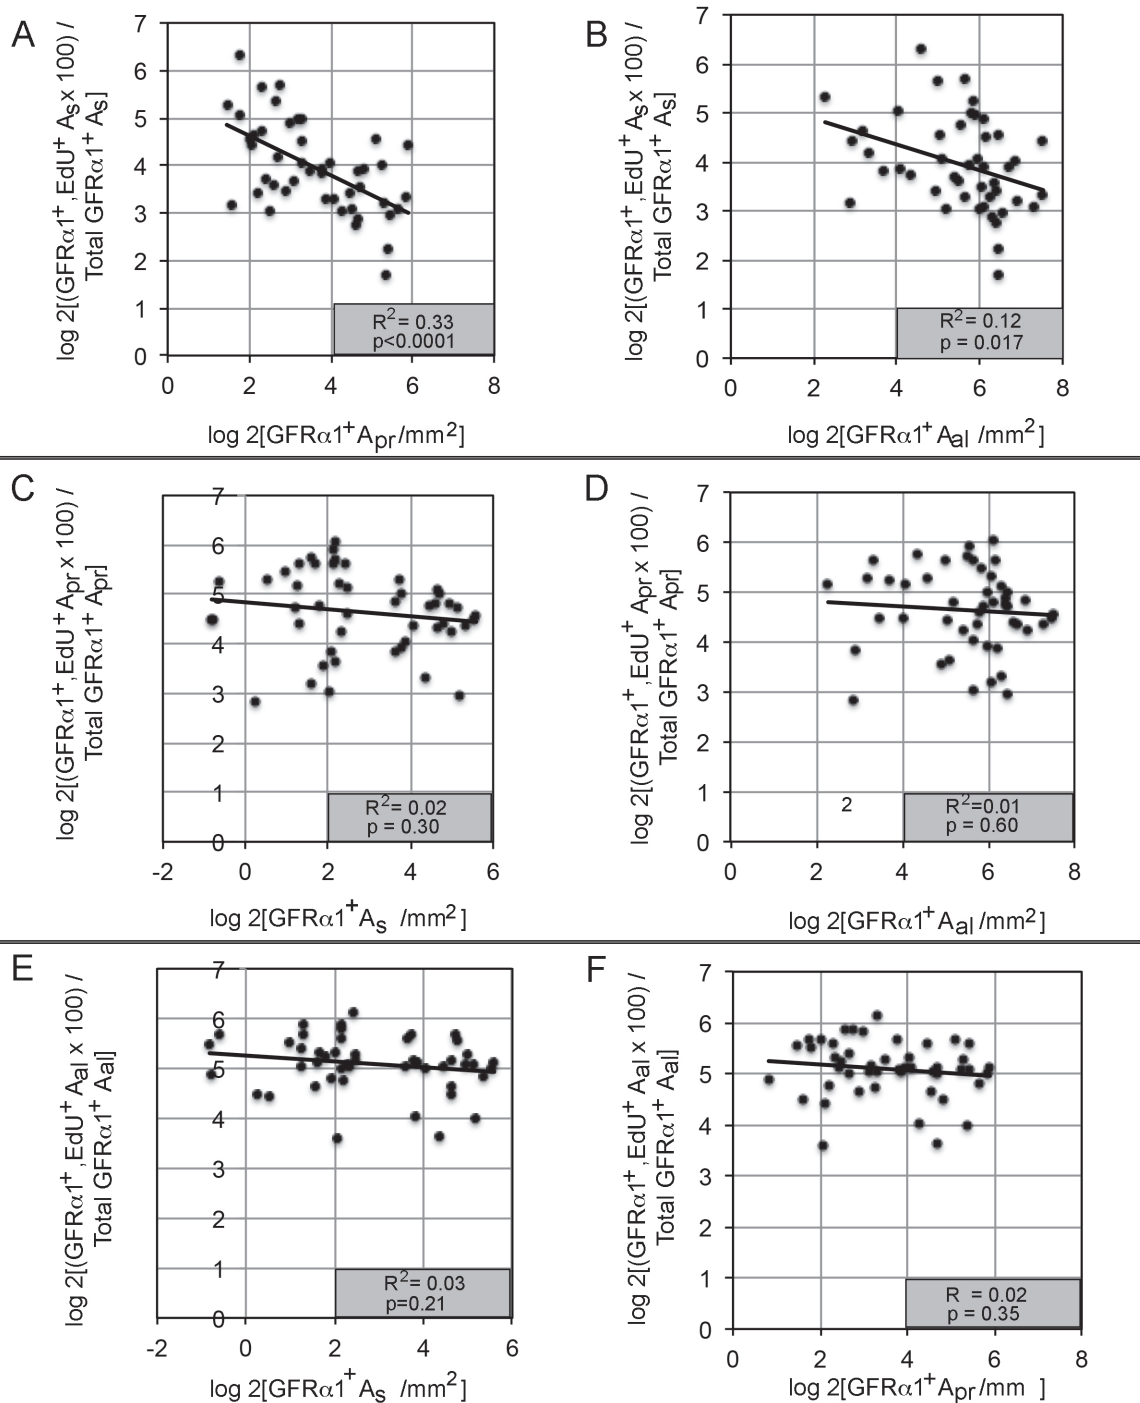

Figure S5. The replication of GFRα1<sup>+</sup> A<sub>s</sub> spermatogonia decreases as densities of GFRα1<sup>+</sup> A<sub>pr</sub> and A<sub>al</sub> spermatogonia increase. This figure is related to Figure 5. For each control and treated animal (Fig. 2 B,C) densities of GFRα1<sup>+</sup> A<sub>s</sub>, A<sub>pr</sub>, and A<sub>al</sub> spermatogonia and the fractions of the other 2 cell types that were EdU<sup>+</sup> were log<sub>2</sub> transformed and replication of one cell type plotted against the densities of 1 of the other 2. Correlation coefficients and p values for each analysis are presented in each gray box.

## Supplemental Tables

Table S1: Production of New Cells from Replicating GFRa1+ As, Apr and Aal Spermatogonia During Each 3.2 Day Period Following 9 Days of Inhibited GDNF Signaling.

| Day*                                                 | Number of cells/mm <sup>2</sup> ** at start of each 3.2-day period |       |       | Fraction of cells replicating during the 24 hrs prior to collection*** |       |       | Estimated number of new cells from replication of each cell type**** |              |               |               |
|------------------------------------------------------|--------------------------------------------------------------------|-------|-------|------------------------------------------------------------------------|-------|-------|----------------------------------------------------------------------|--------------|---------------|---------------|
|                                                      | As                                                                 | Apr   | Aal   | As                                                                     | Apr   | Aal   | As                                                                   | Apr          | Aal           | Total         |
| 10                                                   | 3.42                                                               | 7.07  | 9.75  | 0.592                                                                  | 0.591 | 0.381 | 2.03                                                                 | 4.18         | 3.72          | 9.92          |
| 13.2                                                 | 2.35                                                               | 5.67  | 35.81 | 1.000                                                                  | 0.612 | 0.538 | 2.35                                                                 | 3.47         | 19.28         | 25.10         |
| 16.4                                                 | 3.17                                                               | 6.97  | 42.89 | 0.681                                                                  | 0.555 | 0.548 | 2.16                                                                 | 3.87         | 23.50         | 29.53         |
| 19.6                                                 | 6.38                                                               | 9.91  | 47.94 | 0.449                                                                  | 0.627 | 0.555 | 2.87                                                                 | 6.22         | 26.61         | 35.70         |
| 22.8                                                 | 10.35                                                              | 13.00 | 55.58 | 0.571                                                                  | 0.783 | 0.592 | 5.91                                                                 | 10.18        | 32.90         | 48.99         |
| 26                                                   | 15.15                                                              | 19.00 | 67.72 | 0.461                                                                  | 0.517 | 0.516 | 6.98                                                                 | 9.82         | 34.95         | 51.75         |
| <b>Calculated total cell yield from replication:</b> |                                                                    |       |       |                                                                        |       |       | <b>22.29</b>                                                         | <b>37.74</b> | <b>140.95</b> | <b>200.98</b> |

\* Time in days at the start of each 3.2 day period. Mice were treated with 1NaPP1-HCl from day 1 to day 9 of the experiment. The first samples were collected on day 10.

\*\* Numbers of cells/mm<sup>2</sup> at the beginning of each 3.2 day period.

\*\*\*Fraction of cells replicating = Fraction of cells that incorporated EdU / EdU-labeling efficiency.

\*\*\*\*Yield of new cells from replication = (Number of EdU positive cells calculated from Figure 2C.

\*\*\*\*\*Yield of new cells from replication = (Number of Cells at start of cell cycle X percent of cells replicating)/100.

Table S1 is related to Table 1 in the text.

**Table S2:** Sources and Catalogue Numbers of Key Reagents and Kits and Working Concentrations of Antibodies

| <b>Primer</b>                                  | <b>Source</b>                        | <b>Catalogue No.</b> |
|------------------------------------------------|--------------------------------------|----------------------|
| Mouse GDNF                                     | Applied Biosystems                   | Mm00599849_m1        |
| Mouse GFR $\alpha$ 1                           | Applied Biosystems                   | Mm00439086_m1        |
| Mouse FGF2                                     | Applied Biosystems                   | Mm01285715_m1        |
| Mouse CXCL12                                   | Applied Biosystems                   | Mm00445553_m1        |
| Mouse Ret                                      | Applied Biosystems                   | Mm00436304_m1        |
| Mouse Kif26a                                   | Applied Biosystems                   | Mm01339746_m1        |
| Human 18S rRNA                                 | Applied Biosystems                   | 4319413E             |
|                                                |                                      |                      |
| <b>Antibodies (Working Conc.)</b>              | <b>Source</b>                        | <b>Catalogue No.</b> |
| ZBTB16 [PLZF] (1:1000)                         | R&D Systems                          | AF2944               |
| GFR $\alpha$ 1 (1:200 and 1:100)               | R&D Systems                          | AF560                |
| c-Kit (1:50)                                   | Novus Biologics USA                  | NB100-77477          |
| BrdU(1:200)                                    | Developmental Studies Hybridoma Bank | G3G4                 |
| Claudin 11(1:100)                              | Invitrogen                           | 36-4500              |
| Alexa Fluor 488-donkey anti-goat IgG (1:200)   | Invitrogen                           | A11055               |
| Alexa Fluor 546- donkey anti goat IgG (1:200)  | Invitrogen                           | A11056               |
| Alexa Fluor 488 donkey-anti rat IgG (1:200)    | Invitrogen                           | A21208               |
| Alexa Fluor 647 rabbit anti-mouse IgG (1:500)  | Invitrogen                           | A21239               |
| Alexa Fluor 555 donkey anti-rabbit IgG (1:500) | Invitrogen                           | A31572               |
|                                                |                                      |                      |
| <b>Kits</b>                                    | <b>Source</b>                        | <b>Catalogue No.</b> |
| GDNF Emax ImmunoAssay System                   | Promega                              | G7621                |
| Superscript III First Strand Synthesis         | Invitrogen                           | 18080-051            |
| Rneasy Mini Kit                                | Qiagen                               | 74104                |
| Click-It EdU Alexa Fluor 555 Imaging Kit       | Invitrogen                           | C10338               |

Table S2 is related to methods.

## Supplemental Methods

**Treatment of Mice.** Mice were administered daily subscapular injections of 43.7 mg/kg of the ATP competitive inhibitor, 1NaPP1-HCl, which was synthesized and prepared for injection as previously described (Savitt et al., 2012). Controls were injected with vehicle (saline: cremophor EL (7:2)). Administration of drug occurred at the same time of day ( $\pm 1$  hour). To estimate the relative numbers of cells that were replicating 24 hours prior to tissue collection, mice were injected intraperitoneally with 20 mg/kg of the thymidine analogue, 5'-ethynyl-2'-deoxyuridine (EdU, Invitrogen, Carlsbad, CA) (Parker et al., 2014).

To determine EdU-labeling efficiency mice were injected once or every hour for 24 hours with EdU. In this experiment, after inserting the needle into the abdomen but before injection of EdU, a slight negative pressure was applied to the syringe. If blood was observed in the syringe, the animal was immediately sacrificed. Labeling efficiency for each cell type was defined as: Fraction of GFRa1<sup>+</sup>A<sub>s</sub>, A<sub>pr</sub> and A<sub>al</sub> spermatogonia that were EdU<sup>+</sup> after 1 injection / fraction of cells that were EdU<sup>+</sup> after 12 injections.

To determine the length of the cell cycle of GFRa1<sup>+</sup>A<sub>s</sub> spermatogonia, mice were injected first with 140 mg/kg of the thymidine analogue, 5'-bromo-2'-deoxyuridine (BrdU) and then 60, 66, 72, 76 and 93 hours later, with 20 mg/kg of EdU. Mice were sacrificed 2 hours after the second injection and tubules processed for GFRa1 and BrdU immunocytochemistry and for EdU-click chemistry.

**Immunocytochemistry and Microscopy.** Seminiferous tubules were isolated, fixed and immunostained for GFRa1, ZBTB16 and/or Kit as previously described (Parker et al., 2014; Savitt et al., 2012). In all experiments negative controls (nonimmune IgG) were run to document antibody specificity. We identified cells that incorporated the thymidine analogue EdU, as previously described (Parker et al., 2014). In comparing the numbers of EdU<sup>+</sup> cells in animals injected once or 12 times, we adjusted the laser power of the confocal microscope so that Alexafluor 555-fluorescence intensities were similar in both groups. To detect incorporation of the two-thymidine analogues, BrdU and EdU, by GFRa1<sup>+</sup> spermatogonia, we first used our standard GFRa1 immunostaining protocol. Then tubules were washed twice for 10 minutes at room temperature (RT) with PBS and then incubated for 20 minutes at 37°C in 3N HCl. Tubules were immediately incubated at RT twice for 10 minutes in 0.1M Sodium borate, pH=8.0. Following three 10 minute RT washes in PBS, 1% BSA, 0.1% Triton X-100, tubules were incubated overnight at 4°C in 1:200 anti-BrdU. Tubules were then washed 6 times for 15 minutes in PBS, 1% BSA, 0.1% Triton X-100 at RT, incubated overnight at 4°C in Alexafluor 647-rabbit anti-mouse IgG and then washed 6 more times at RT. Incorporation of EdU was subsequently assayed by our standard protocol. During capture of images by confocal microscopy, Alexafluor 647 fluorescence was recorded as white light. Supplemental Table 2 lists the sources and working concentrations of all antibodies and kits.

To immunolocalize claudin 11, seminiferous tubules were fixed at RT for 4 hours in 4% formaldehyde and then washed exhaustively with PBS. Tubules were permeabilized at RT for 30 minutes by incubation in PBS, 1%BSA, 0.2% Tween 20, which was also the antibody diluent and wash buffer for the entire protocol. Tubules were incubated overnight at 4°C, in anti-claudin 11, washed 6 times at RT for 15 minutes, and incubated overnight at 4°C in 1:500 AlexaFluor 555 donkey anti-rabbit IgG. After 6 more washes, tubules were mounted in Vectashield with DAPI, in order to stain nuclei. Serial optical sections were captured for all tubules. Within a given plane of focus, the optical sections for claudin-11 and for DAPI were 2.2 and 0.9  $\mu$ m, respectively. Four micrometers separated

sequential optical sections.

For all but one experiment, whole mounts of seminiferous tubules were imaged using a Zeiss LSM 710 or 710 Confocal Microscope equipped with argon and helium-neon lasers. Depending on the experiment, optical sections of 1.8 or 2.2 microns were captured. We often captured serial, overlapping optical sections in order to clearly document direct physical contact of the plasma membranes of two or more GFR $\alpha$ 1<sup>+</sup> spermatogonia. Laser strengths and the depth of optical sections were determined empirically at the beginning of the analysis of each experiment and then were used for analysis of all samples. Tubules processed for ZBTB16<sup>+</sup> cells were imaged by fluorescence microscopy as previously described (Savitt et al., 2012). We used previously described protocols to enumerate cells/mm<sup>2</sup> of tubule surface (Parker et al., 2014).

In one experiment, testes were immersion fixed at 4°C in 5% glutaraldehyde in cacodylate buffer, postfixed in osmium tetroxide, embedded in Epon 812, and 1-micron thick sections stained with Toluidine blue. Four to six different testis cross sections are evaluated and a minimum of 300 tubules per testis were classified as exhibiting normal spermatogenesis, incomplete spermatogenesis (missing 1-3 generations of spermatogenic cells) or Sertoli cell-only (absence of all spermatogenic cells).

Quantitative PCR. RNA was isolated with RNeasy columns (Qiagen). RNA concentrations were determined using a NanoDrop spectrophotometer (Thermo Scientific, Wilmington DE). Libraries of cDNA were generated from 1 mg of RNA with random hexamers and the First Strand Synthesis Superscript III kit (Invitrogen). Transcript levels were quantified using Taqman gene expression assays and a StepOne Plus instrument (ThermoFisher Scientific). Standard curves of sequence-verified cDNAs were run in each assay. Data were normalized for the concentration of 18S rRNA in each sample. Supplemental table 4 provides catalogue number for all Taqman assays.

Quantification of GDNF protein from mouse whole testis lysates. GDNF protein was measured using the GDNF Emax Immunoassay System (Promega, Madison, WI). Preliminary control experiments showed that this assay could readily distinguish differences in the concentrations of GDNF in different fluids of mice and rats (serum, seminiferous tubule fluid, testis interstitial fluid) predicted to contain different levels of GDNF. Fresh testes (200 mg/ml) were immediately homogenized on ice in lysis buffer containing 20mM Tris, 137 mM NaCl, 10mg/ml aprotinin, 1mg/ml leupeptin, and 1mM PMSF. Homogenates were centrifuged for 30 minutes at 15,000 RPM at 4°C and supernatant stored at -80°C until use. A 5 ml aliquot was used to measure total protein (Bradford, 1976). Data were expressed as ng of GDNF/mg of total protein.

RNA Sequencing. Total testis RNA was isolated and quality assessed as previously described (Singh et al., 2017). Libraries were generated with the NEBNext [Directional] Ultra RNA Library Prep Kit (New England Biolabs) and sequenced using an Illumina NextSeq500 instrument at 20 million single end, 90 nucleotide reads per library. The reference genome used for the cDNA libraries was the mouse (mm10) database on the UCSC genome browser (Zeisel et al., 2013). Database analyses were performed with cutadapt, bowtie2, tophat2, and cuffdiff2 (Chen et al., 2014; Langmead and Salzberg, 2012) (Trapnell et al., 2009; Trapnell et al., 2010). The level of detection in this analysis was defined as an FPKM  $\geq$  0.1. A significant difference between control and treated testes in transcript expression was defined as FDR  $\leq$  0.05. The RNAseq data were uploaded to GEO with accession #GSE111487.

### Primers and PCR conditions for determining mouse genotypes.

Genomic DNA was isolated from tail biopsies, and mice homozygous for Ret V805A and heterozygous for the Rosa26 transgene were identified by polymerase chain reaction (PCR) using primers and assay conditions described below:

Ret (V805):

Ret F: 5'- GGA CGG AAC AGT GCT TCT TG - 3'

Ret R: 5'- CTC GGC GAC AGC CTA TCT TA - 3'

PCR conditions were 3 minutes at 95°C followed by 35 cycles of 1 minute at 95°C, 1 minute at 54.5°C, 2 minutes at 72°C, followed by a 2 minute incubation at 72°C.

LacZ:

LacZ -F: 5'-ATG GGT AAC AGT CTT GGC GG-3'

LacZ -R: 5'-GGC GTA TCG CCA AAA TCA CC-3'

PCR conditions were 3 minutes at 95°C followed by 35 cycles of 1 minute at 95°C, 1 minute at 55°C, 2 minutes at 72°C, followed by a 2 minute incubation at 72°C.

ID4-EGFP:

GFP F: 5'-AAG TTC ATC TGC ACC ACC G-3'

GFP R: 5'-TCC TTG AAG AAG ATG GTG CG-3'

PCR conditions were 3 minutes at 94°C followed by 35 cycles of 1 minute at 94°C, 1 minute at 55°C, 2 minutes at 68°C, followed by a 2 minute incubation at 68°C.

### **Supplemental References**

- Bradford, M.M. (1976). A rapid and sensitive method for the quantitation of microgram quantities of protein utilizing the principle of protein-dye binding. *Anal Biochem* 72, 248-254.
- Chen, C., Khaleel, S.S., Huang, H., and Wu, C.H. (2014). Software for pre-processing Illumina next-generation sequencing short read sequences. *Source Code Biol Med* 9, 8.
- Langmead, B., and Salzberg, S.L. (2012). Fast gapped-read alignment with Bowtie 2. *Nat Methods* 9, 357-359.
- Parker, N., Falk, H., Singh, D., Fidaleo, A., Smith, B., Lopez, M.S., Shokat, K.M., and Wright, W.W. (2014). Responses to glial cell line-derived neurotrophic factor change in mice as spermatogonial stem cells form progenitor spermatogonia which replicate and give rise to more differentiated progeny. *Biology of reproduction* 91, 92.
- Savitt, J., Singh, D., Zhang, C., Chen, L.C., Folmer, J., Shokat, K.M., and Wright, W.W. (2012). The in vivo response of stem and other undifferentiated spermatogonia to the reversible inhibition of glial cell line-derived neurotrophic factor signaling in the adult. *Stem Cells* 30, 732-740.
- Singh, D., Paduch, D.A., Schlegel, P.N., Orwig, K.E., Mielnik, A., Bolyakov, A., and Wright, W.W. (2017). The production of glial cell line-derived neurotrophic factor by human sertoli cells is substantially reduced in sertoli cell-only testes. *Human reproduction* 32, 1108-1117.
- Trapnell, C., Pachter, L., and Salzberg, S.L. (2009). TopHat: discovering splice junctions with RNA-Seq. *Bioinformatics* 25, 1105-1111.
- Trapnell, C., Williams, B.A., Pertea, G., Mortazavi, A., Kwan, G., van Baren, M.J., Salzberg, S.L., Wold, B.J., and Pachter, L. (2010). Transcript assembly and quantification by RNA-Seq reveals unannotated transcripts and isoform switching during cell differentiation. *Nat Biotechnol* 28, 511-515.
- Zeisel, A., Yitzhaky, A., Bossel Ben-Moshe, N., and Domany, E. (2013). An accessible database for mouse and human whole transcriptome qPCR primers. *Bioinformatics* 29, 1355-1356.
